# Supplementary material
Source: ML conference proceedings conference paper supplement (https://openreview.net/forum?id=bH4LVNVXUo)
Supplement: supplementary_material [file attachment]

## Objective

Training an expressive convolutional neural network with a **known, tight upper-bound** on its **Lipschitz constant** by enforcing **gradient norm preservation (GNP)**.

## Motivation

### Why Lipschitz-constrained Networks?

1. Provable adversarial robustness via large-margin training.
2. 1-Wasserstein distance estimation via Kantorovich and Rubinstein duality [8].

### Why Gradient Norm Preservation (GNP)?

1-Lipschitz-constrained networks suffer from two common problems solved by GNP:

1. Loose upper-bound obtained by  $\text{Lip}(f_1 \circ f_2) \leq \text{Lip}(f_1) \text{Lip}(f_2)$ .
2. Gradient attenuation during backpropagation since  $\|\nabla_{\mathbf{x}} \mathcal{L}\|_2 \leq \text{Lip}(f) \|\nabla_{\mathbf{y}} \mathcal{L}\|_2$ , where  $\mathbf{y} = f(\mathbf{x})$ .

### Challenges of Enforcing GNP for Convolutional Networks

1. Optimization over the space of GNP convolutions does not have an established method.
2. Topology is unknown for GNP convolutions.

## Background

**GNP Functions:**  $f$  is GNP if  $\|\nabla f(\mathbf{x})^T \mathbf{g}\|_2 = \|\mathbf{g}\|_2, \forall \mathbf{g}$ .

- GNP functions have a Lipschitz constant of 1; Composition of GNP functions are GNP.
- GNP linear functions are **orthogonal**; GNP convolutions are **orthogonal convolutions**.

**Symmetric Projectors:**  $\mathbb{P}(n, k) = \{P | P = P^T = P^2, \text{rank}(P) = k, P \in \mathbb{R}^{n \times n}\}$ .

$\mathbb{P}(n) = \bigcup_k \mathbb{P}(n, k)$  has  $n + 1$  connected components:  $\{\mathbb{P}(n, 0), \dots, \mathbb{P}(n, k), \dots, \mathbb{P}(n, n)\}$ .

## Orthogonal Convolutions Are Disconnected

### Block Convolution Parameterization in 1-D [6]

$$\mathcal{W}(H, P_{1:K-1}) = H \square [P_1 (I - P_1)] \square \dots \square [P_{K-1} (I - P_{K-1})],$$

$$\text{where } P_i \in \mathbb{P}(n), H \in O(n), [X \square Y]_i = \sum_{i'=-\infty}^{\infty} X_{i'} Y_{i-i'}.$$

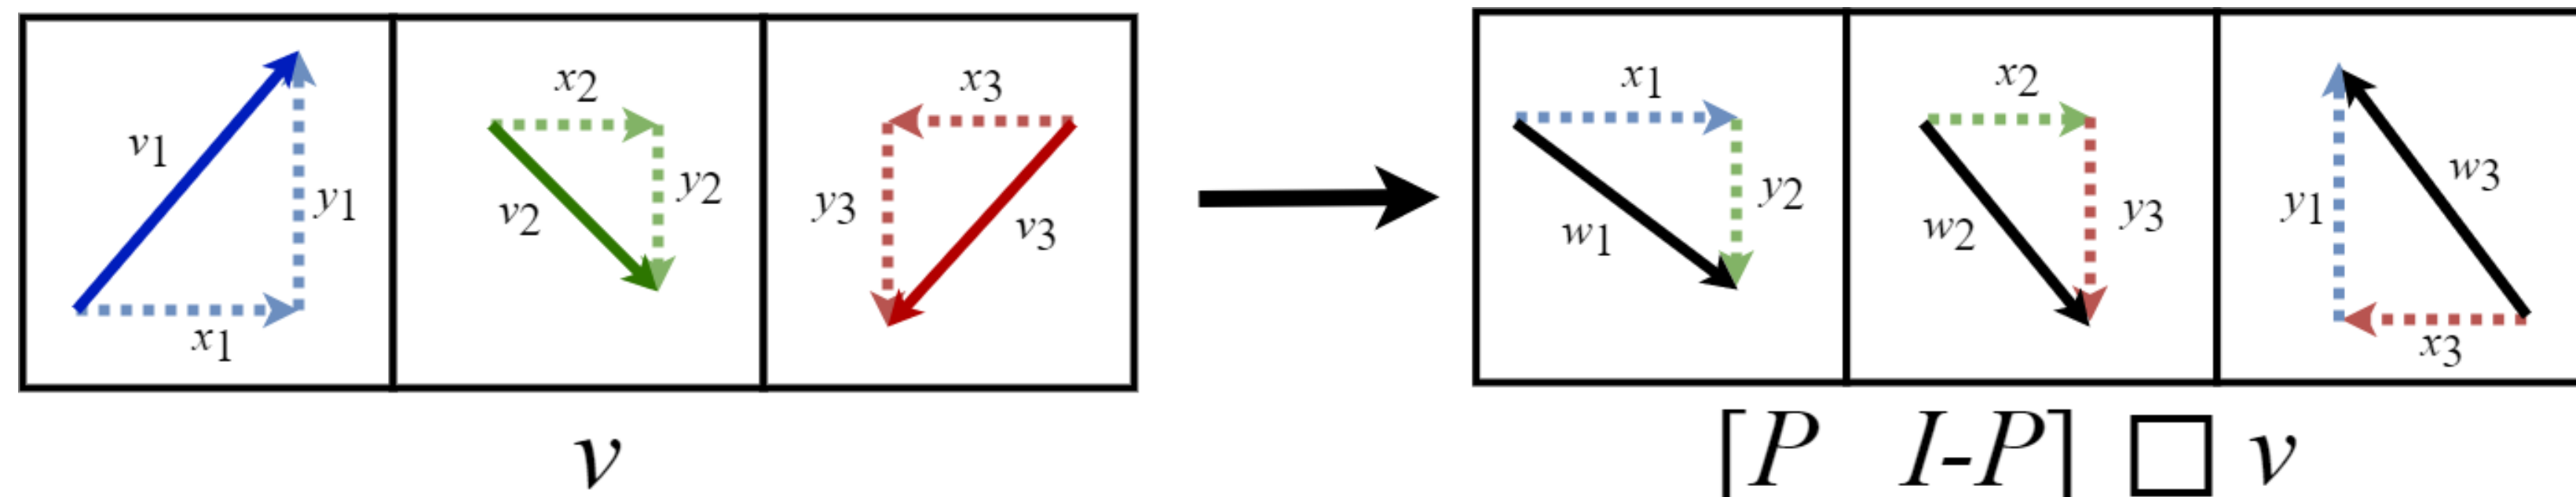

**Theorem 1:** 1-D orthogonal convolution space has  $2(K-1)n+2$  connected components.

**Extension to 2-D:** Analogous parameterization and disconnectedness results as 1-D [10].

**Implication:** Gradient-based optimization would be trapped in the initial connected component.

## Overcoming Disconnectedness

**Theorem 2:** For any convolution  $C = \mathcal{W}(H, P_{1:K-1}, Q_{1:K-1})$  with input and output channel sizes of  $n$  ( $P_i, Q_i \in \mathbb{P}(n)$ ), there exists a convolution  $C' = \mathcal{W}(H', P'_{1:K-1}, Q'_{1:K-1})$  with input and output channels sizes of  $2n$  constructed from only  $n$ -rank projectors ( $P'_i, Q'_i \in \mathbb{P}(2n, n)$ ) such that  $C'(\mathbf{x})_{1:n} = C(\mathbf{x}_{1:n})$ . That is, the first  $n$  channels of the output is the same with respect to the first  $n$  channels of the input under both convolutions.

**Implication:** Using this, one can double the number of channels of a BCOP constructed network to represent all the connected components of the original network in a *single* connected component.

## Block Convolution Orthogonal Parameterization (BCOP)

A BCOP orthogonal convolution of  $2n$  channel size is

$$\mathcal{W}(H, P_{1:K-1}, Q_{1:K-1}), P_i, Q_i \in \mathbb{P}(2n, n)$$

We can use any unconstrained matrix  $\tilde{R} \in \mathbb{R}^{2n \times n}$  to parameterize  $T \in \mathbb{P}(2n, n)$ ,

$$T = R R^T, R = \psi(\tilde{R})$$

where  $\psi$  can be any differentiable orthogonalization procedure that results in a matrix of the same size,  $R \in \mathbb{R}^{2n \times n}$ , with orthonormal columns:  $R^T R = I$  (e.g., Björck orthogonalization [2]).

**Design Rationale:**  $\mathbb{P}(2n, n)$  is the largest connected component of  $\mathbb{P}(2n)$  by dimensionality and using  $\mathbb{P}(2n, n)$  to construct BCOP layers represents all networks with channel size of  $n$ .

## Building GNP Convolutional Networks

| Network Components   | Problems under GNP                         | Solutions                    |
|----------------------|--------------------------------------------|------------------------------|
| Residual connection  | Degenerates into identity                  | Removed                      |
| Batch normalization  | Not GNP                                    | Removed                      |
| Zero-padding         | Degenerates into $1 \times 1$ convolutions | Cyclic padding instead       |
| Strided convolution  | Orthogonality properties unknown           | Invertible downsampling [5]  |
| Linear layer         | Not GNP in general                         | Orthogonalize the matrix [1] |
| Nonlinear activation | Not GNP in general                         | GroupSort [1]                |

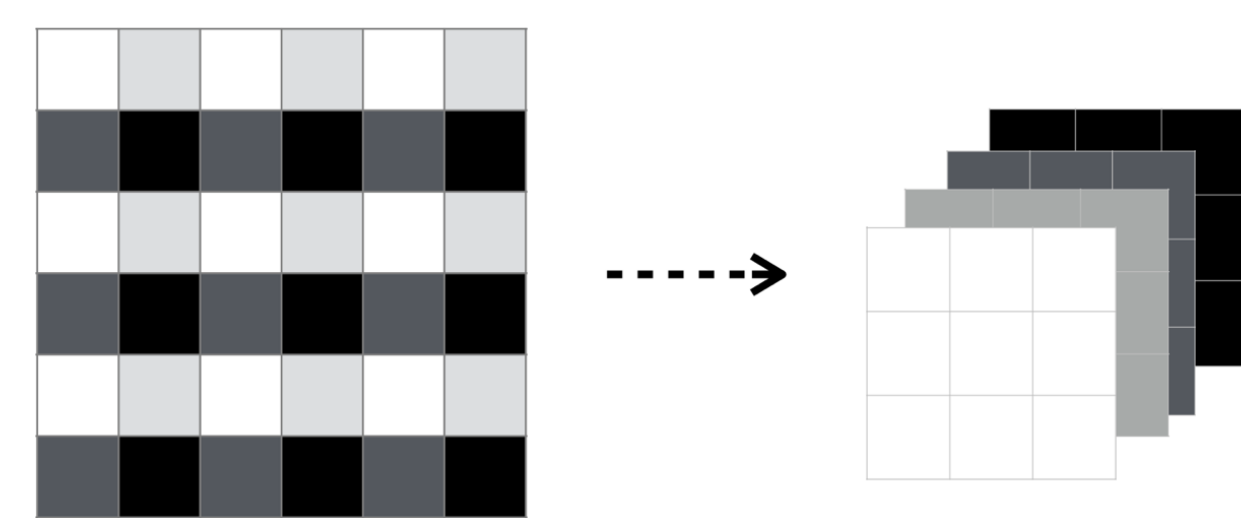

Figure: Invertible Downsampling [5]

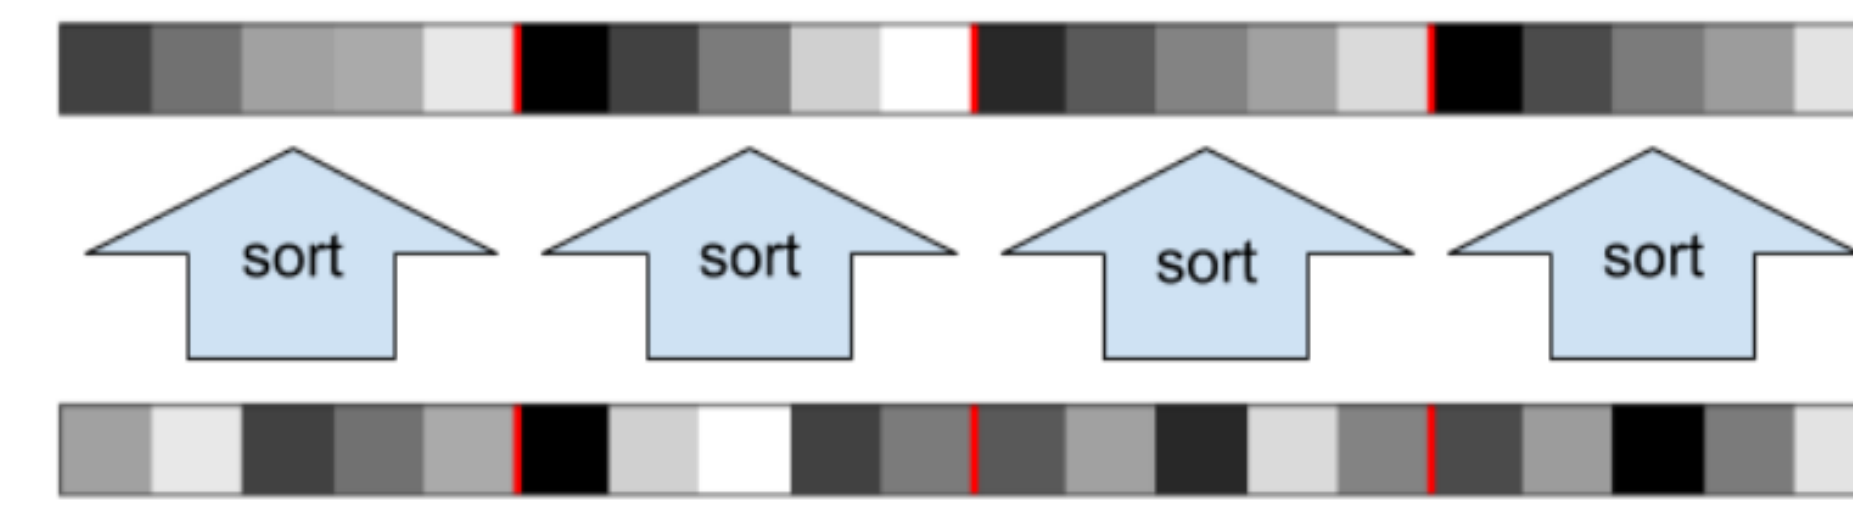

Figure: GroupSort [1]

## Empirical Results: Provable Adversarial Robustness Under $L_2$ Norm

### Ablation Study (Provable Adversarial Robustness with $L_2$ Metric)

| Dataset                               |       |        | OSSN [4] | RKO [3] | SVCM [7] | BCOP         |
|---------------------------------------|-------|--------|----------|---------|----------|--------------|
| MNIST<br>( $\varepsilon = 1.58$ )     | Small | Clean  | 96.86    | 97.28   | 97.24    | <b>97.54</b> |
|                                       |       | Robust | 42.95    | 43.58   | 28.94    | <b>45.84</b> |
|                                       | Large | Clean  | 98.31    | 98.44   | 97.93    | <b>98.69</b> |
|                                       |       | Robust | 53.77    | 55.18   | 38.00    | <b>56.37</b> |
| CIFAR10<br>( $\varepsilon = 36/255$ ) | Small | Clean  | 62.18    | 61.77   | 62.39    | <b>64.53</b> |
|                                       |       | Robust | 48.03    | 47.46   | 47.59    | <b>50.01</b> |
|                                       | Large | Clean  | 67.51    | 70.01   | 69.65    | <b>72.16</b> |
|                                       |       | Robust | 53.64    | 55.76   | 53.61    | <b>58.26</b> |

### State-of-the-art Comparison ( $L_2$ )

| Dataset                               |        | BCOP-Large   | FC-3         | KW-Large [9] | KW-Resnet [9] |
|---------------------------------------|--------|--------------|--------------|--------------|---------------|
| MNIST<br>( $\varepsilon = 1.58$ )     | Clean  | 98.69        | <b>98.71</b> | 88.12        | —             |
|                                       | Robust | <b>56.37</b> | 54.46        | 44.53        | —             |
| CIFAR10<br>( $\varepsilon = 36/255$ ) | Clean  | <b>72.16</b> | 62.60        | 59.76        | 61.20         |
|                                       | Robust | <b>58.26</b> | 49.97        | 50.60        | 51.96         |

### Singular Value Distribution of a Conv Layer Jacobian Before and After Training

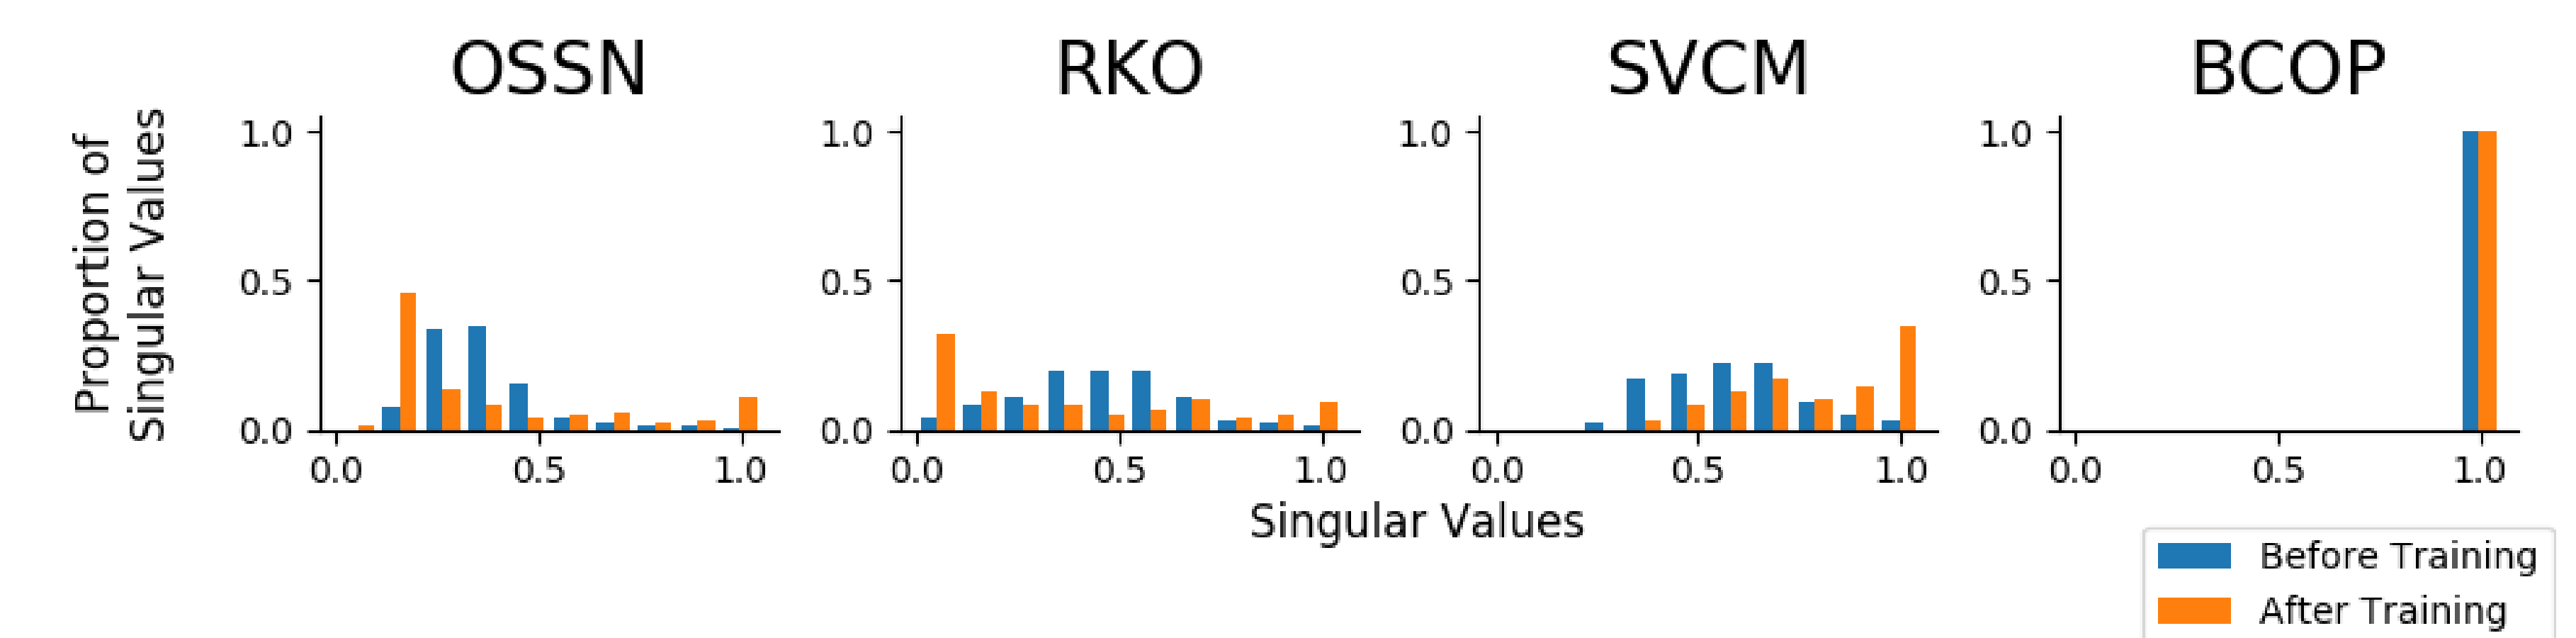

## Empirical Results: 1-Wasserstein Distance Estimation

|        | BCOP        | RKO  | OSSN |
|--------|-------------|------|------|
| MaxMin | <b>9.91</b> | 8.95 | 7.39 |
| ReLU   | <b>8.28</b> | 7.82 | 7.06 |

**Note:** All the methods give a lower bound on the Wasserstein distance (higher is better).

## References

- [1] C. Anil, J. Lucas, and R. Grosse. Sorting out Lipschitz function approximation. In K. Chaudhuri and R. Salakhutdinov, editors, *Proceedings of the 36th International Conference on Machine Learning*, volume 97 of *Proceedings of Machine Learning Research*, pages 291–301, Long Beach, California, USA, 09–15 Jun 2019. PMLR.
- [2] Å. Björck and C. Bowie. An iterative algorithm for computing the best estimate of an orthogonal matrix. *SIAM Journal on Numerical Analysis*, 8(2):358–364, 1971.
- [3] M. Cisse, P. Bojanowski, E. Grave, Y. Dauphin, and N. Usunier. Parseval networks: Improving robustness to adversarial examples. In *Proceedings of the 34th International Conference on Machine Learning-Volume 70*, pages 854–863. JMLR. org, 2017.
- [4] H. Gouk, E. Frank, B. Pfahringer, and M. Cree. Regularisation of neural networks by enforcing Lipschitz continuity. *arXiv preprint arXiv:1804.04368*, 2018.
- [5] J.-H. Jacobsen, A. W. Smeulders, and E. Oyallon. i-RevNet: Deep invertible networks. In *International Conference on Learning Representations*, 2018.
- [6] J. Kautsky and R. Turcajová. A matrix approach to discrete wavelets. In *Wavelet Analysis and Its Applications*, volume 5, pages 117–135. Elsevier, 1994.
- [7] H. Sedghi, V. Gupta, and P. M. Long. The singular values of convolutional layers. In *International Conference on Learning Representations*, 2019.
- [8] C. Villani. *Optimal transport: old and new*, volume 338. Springer Science & Business Media, 2008.
- [9] E. Wong, F. Schmidt, J. H. Metzen, and J. Z. Kolter. Scaling provable adversarial defenses. In *Advances in Neural Information Processing Systems*, pages 8400–8409, 2018.
- [10] L. Xiao, Y. Bahri, J. Sohl-Dickstein, S. Schoenholz, and J. Pennington. Dynamical isometry and a mean field theory of CNNs: How to train 10,000-layer vanilla convolutional neural networks. In *Proceedings of the 35th International Conference on Machine Learning*, pages 5393–5402, 2018.
