# Supplementary material
Source: ML conference proceedings conference paper supplement (https://openreview.net/forum?id=bH4LVNVXUo)
Supplement: supplementary_material [file attachment]

---

# Asymmetric Certified Robustness via Feature-Convex Neural Networks

---

Anonymous Author(s)

Affiliation

Address

email

## Abstract

1 Real-world adversarial attacks on machine learning models often feature an asym-  
2 metric structure wherein adversaries only attempt to induce false negatives (e.g.,  
3 classify a spam email as not spam). We formalize the asymmetric robustness certi-  
4 fication problem and correspondingly present the *feature-convex neural network*  
5 architecture, which composes an input-convex neural network (ICNN) with a Lips-  
6 chitz continuous feature map in order to achieve asymmetric adversarial robustness.  
7 We consider the aforementioned binary setting with one “sensitive” class, and for  
8 this class we prove deterministic, closed-form, and easily-computable certified ro-  
9 bust radii for arbitrary  $\ell_p$ -norms. We theoretically justify the use of these models by  
10 characterizing their decision region geometry, extending the universal approxima-  
11 tion theorem for ICNN regression to the classification setting, and proving a lower  
12 bound on the probability that such models perfectly fit even unstructured uniformly  
13 distributed data in sufficiently high dimensions. Experiments on Maling malware  
14 classification and subsets of the MNIST, Fashion-MNIST, and CIFAR-10 datasets  
15 show that feature-convex classifiers attain substantial certified  $\ell_1$ ,  $\ell_2$ , and  $\ell_\infty$ -radii  
16 while being far more computationally efficient than competitive baselines.

## 17 1 Introduction

18 Although neural networks achieve state-of-the-art performance across a range of machine learning  
19 tasks, researchers have shown that they can be highly sensitive to adversarial inputs that are mali-  
20 ciously designed to fool the model [11, 61, 53]. For example, the works Eykholt et al. [22] and Liu  
21 et al. [43] show that small physical and digital alterations of vehicle traffic signs can cause image  
22 classifiers to fail. In safety-critical applications of neural networks, such as autonomous driving  
23 [12, 69] and medical diagnostics [1, 71], this sensitivity to adversarial inputs is clearly unacceptable.

24 A line of heuristic defenses against adversarial inputs has been proposed, only to be defeated by  
25 stronger attack methods [14, 36, 7, 64, 47]. This has led researchers to develop certifiably robust  
26 methods that provide a provable guarantee of safe performance. The strength of such certificates can  
27 be highly dependent on network architecture; general off-the-shelf models tend to have large Lipschitz  
28 constants, leading to loose Lipschitz-based robustness guarantees [29, 23, 73]. Consequently, lines  
29 of work that impose certificate-amenable structures onto networks have been popularized, e.g.,  
30 specialized model layers [63, 77], randomized smoothing-based networks [41, 18, 76, 72, 3], and  
31 ReLU networks that are certified using convex optimization and mixed-integer programming [68, 67,  
32 55, 4, 46]. The first category only directly certifies against one specific choice of norm, producing  
33 poorly scaled radii for other norms in high dimensions. The latter two method families incur serious  
34 computational challenges: randomized smoothing typically requires the classification of thousands  
35 of randomly perturbed samples per input, while optimization-based solutions scale poorly to large  
36 networks.

Despite the moderate success of these certifiable classifiers, conventional assumptions in the literature are unnecessarily restrictive for many practical adversarial settings. Specifically, most works consider a multiclass setting where certificates are desired for inputs of any class. By contrast, many real-world adversarial attacks involve a binary setting with only one *sensitive class* that must be robust to adversarial perturbations. Consider the representative problem of spam classification; a malicious adversary crafting a spam email will only attempt to fool the classifier toward the “not-spam” class—never conversely [20]. Similar logic applies for a range of applications such as malware detection [28], malicious network traffic filtering [57], fake news and social media bot detection [19], hate speech removal [27], insurance claims filtering [24], and financial fraud detection [15].

The important asymmetric nature of these classification problems has long been recognized in various subfields, and some domain-specific attempts at robustification have been proposed with this in mind. This commonly involves robustifying against adversaries appending features to the classifier input. In spam classification, such an attack is known as the “good word” attack [45]. In malware detection, numerous approaches have been proposed to provably counter such additive-only adversaries using special classifier structures such as non-negative networks [25] and monotonic classifiers [32]. We note these works strictly focus on *additive* adversaries and cannot handle general adversarial perturbations of the input that are capable of perturbing existing features. We propose adding this important asymmetric structure to the study of norm ball-certifiably robust classifiers. This narrowing of the problem to the asymmetric setting provides prospects for novel certifiable architectures, and we present feature-convex neural networks as one such possibility.

## 1.1 Problem Statement and Contributions

This section formalizes the *asymmetric robustness certification problem* for general norm-bounded adversaries. Specifically, we assume a binary classification setting wherein one class is “sensitive” and seek to certify that, if some input is classified into this sensitive class, then adversarial perturbations of sufficiently small magnitude cannot change the prediction.

Formally, consider a binary classifier  $f_\tau: \mathbb{R}^d \rightarrow \{1, 2\}$ , where class 1 is the sensitive class for which we desire certificates. We take  $f_\tau$  to be a standard thresholded version of a soft classifier  $g: \mathbb{R}^d \rightarrow \mathbb{R}$ , expressible as  $f_\tau(x) = T_\tau(g(x))$ , where  $T_\tau: \mathbb{R} \rightarrow \{1, 2\}$  is the thresholding function defined by

$$T_\tau(y) = \begin{cases} 1 & \text{if } y + \tau > 0, \\ 2 & \text{if } y + \tau \leq 0, \end{cases} \quad (1)$$

with  $\tau \in \mathbb{R}$  being a user-specified parameter that shifts the classification threshold. A classifier  $f_\tau$  is considered certifiably robust at a class 1 input  $x \in \mathbb{R}^d$  with a radius  $r(x) \in \mathbb{R}_+$  if  $f_\tau(x + \delta) = f_\tau(x) = 1$  for all  $\delta \in \mathbb{R}^d$  with  $\|\delta\| < r(x)$  for some norm  $\|\cdot\|$ . Thus,  $\tau$  induces a tradeoff between the clean accuracy on class 2 and certification performance on class 1. As  $\tau \rightarrow \infty$ ,  $f_\tau$  approaches a constant classifier which achieves infinite class 1 certified radii but has zero class 2 accuracy.

For a particular choice of  $\tau$ , the performance of  $f_\tau$  can be analyzed similarly to a typical certified classifier. Namely, it exhibits a class 2 clean accuracy  $\alpha_2(\tau) \in [0, 1]$  as well as a class 1 certified accuracy surface  $\Gamma$  with values  $\Gamma(r, \tau) \in [0, 1]$  that capture the fraction of the class 1 samples that can be certifiably classified by  $f_\tau$  at radius  $r \in \mathbb{R}_+$ . The class 1 clean accuracy  $\alpha_1(\tau) = \Gamma(0, \tau)$  is inferable from  $\Gamma$  as the certified accuracy at  $r = 0$ .

The full asymmetric certification performance of the family of classifiers  $f_\tau$  can be captured by plotting the surface  $\Gamma(r, \tau)$ , as will be shown in Figure 1a. Instead of plotting against  $\tau$  directly, we plot against the more informative difference in clean accuracies  $\alpha_1(\tau) - \alpha_2(\tau)$ . This surface can be viewed as an asymmetric robustness analogue to the classic receiver operating characteristic curve.

Note that while computing the asymmetric robustness surface is possible for our feature-convex architecture (to be defined shortly), it is computationally prohibitive for conventional certification methods. We therefore standardize our comparisons throughout this work to the certified accuracy cross section  $\Gamma(r, \tau^*)$  for a  $\tau^*$  such that clean accuracies are balanced in the sense that  $\alpha_2(\tau^*) = \alpha_1(\tau^*)$ , noting that  $\alpha_1$  monotonically increases in  $\tau$  and  $\alpha_2$  monotonically decreases in  $\tau$ . We discuss finding such a  $\tau^*$  in Appendix E.4. This choice allows for a direct comparison of the resulting certified accuracy curves without considering the non-sensitive class clean accuracy.

86 With the above formalization in place, the goal at hand is two-fold: 1) develop a classification  
 87 architecture tailored for the asymmetric setting with high robustness, as characterized by the surface  
 88  $\Gamma$ , and 2) provide efficient methods for computing the certified robust radii  $r(x)$  used to generate  $\Gamma$ .

89 **Contributions.** We tackle the above two goals by proposing *feature-convex neural networks* and  
 90 achieve the following contributions:

- 91 1. We exploit the feature-convex structure of the proposed classifier to provide asymmetrically  
 92 tailored closed-form class 1 certified robust radii for arbitrary  $\ell_p$ -norms, solving the second  
 93 goal above and yielding efficient computation of  $\Gamma$ .
- 94 2. We characterize the decision region geometry of feature-convex classifiers, extend the uni-  
 95 versal approximation theorem for input-convex ReLU neural networks to the classification  
 96 setting, and show that, in high dimensions, feature-convex classifiers can perfectly fit even  
 97 unstructured, uniformly distributed datasets, which theoretically emphasizes our method’s  
 98 capacity for robustness without sacrificing clean accuracy.
- 99 3. We evaluate against several baselines on MNIST 3-8 [37], Maling malware classification  
 100 [51], Fashion-MNIST shirts [70], and CIFAR-10 cats-dogs [35], and show that our classifiers  
 101 yield certified robust radii competitive with the state-of-the-art, empirically addressing the  
 102 first goal listed above.

103 All proofs and appendices can be found in the Supplemental Material.

## 104 1.2 Related Works

105 **Certified adversarial robustness.** Three of the most popular approaches for generating robustness  
 106 certificates are Lipschitz-based bounds, randomized smoothing, and optimization-based methods.  
 107 Successfully bounding the Lipschitz constant of a neural network can give rise to an efficient certified  
 108 radius of robustness, e.g., via the methods proposed in Hein and Andriushchenko [29]. However, in  
 109 practice such Lipschitz constants are too large to yield meaningful certificates, or it is computationally  
 110 burdensome to compute or bound the Lipschitz constants in the first place [65, 23, 73]. To overcome  
 111 these computational limitations, certain methods impose special structures on their model layers to  
 112 provide immediate Lipschitz guarantees. Specifically, Trockman and Kolter [63] uses the Cayley  
 113 transform to derive convolutional layers with immediate  $\ell_2$ -Lipschitz constants, and Zhang et al.  
 114 [77] introduces a  $\ell_\infty$ -distance neuron that provides similar Lipschitz guarantees with respect to the  
 115  $\ell_\infty$ -norm. We compare with both these approaches in our experiments.

116 Randomized smoothing, popularized by Lecuyer et al. [38], Li et al. [41], Cohen et al. [18], uses the  
 117 expected prediction of a model when subjected to Gaussian input noise. These works derive  $\ell_2$ -norm  
 118 balls around inputs on which the smoothed classifier remains constant, but suffer from nondeterminism  
 119 and high computational burden. Follow-up works generalize randomized smoothing to certify input  
 120 regions defined by different metrics, e.g., Wasserstein,  $\ell_1$ -, and  $\ell_\infty$ -norms [39, 62, 72]. Other  
 121 works focus on enlarging the certified regions by optimizing the smoothing distribution [76, 21, 5],  
 122 incorporating adversarial training into the base classifier [58, 78], and employing dimensionality  
 123 reduction at the input [54].

124 Optimization-based certificates typically seek to derive a tractable over-approximation of the set  
 125 of possible outputs when the input is subject to adversarial perturbations, and show that this over-  
 126 approximation is safe. Various over-approximations have been proposed, e.g., based on linear  
 127 programming and bounding [68, 67], semidefinite programming [55], and branch-and-bound [4,  
 128 46, 66]. The  $\alpha, \beta$ -CROWN method [66] uses an efficient bound propagation to linearly bound the  
 129 neural network output in conjunction with a per-neuron branching heuristic to achieve state-of-the-art  
 130 certified radii, winning both the 2021 and the 2022 VNN certification competitions [8, 49]. In contrast  
 131 to optimization-based methods, our approach in this paper is to directly exploit the convex structure  
 132 of input-convex neural networks to derive closed-form robustness certificates for our proposed  
 133 architecture, altogether avoiding the common efficiency-tightness tradeoffs of prior methods.

134 **Input-convex neural networks.** Input-convex neural networks, popularized by Amos et al. [2], are a  
 135 class of parameterized models whose input-output mapping is convex (in at least a subset of the input  
 136 variables). In Amos et al. [2], the authors develop tractable methods to learn an input-convex neural

network  $f: \mathbb{R}^d \times \mathbb{R}^n \rightarrow \mathbb{R}$  and show that utilizing it for the convex optimization-based inference  $x \mapsto \arg \min_{y \in \mathbb{R}^n} f(x, y)$  yields state-of-the-art results in a variety of domains. Subsequent works propose novel applications of input-convex neural networks in areas such as optimal control and reinforcement learning [16, 75], optimal transport [48], and optimal power flow [17, 79]. Other works have generalized input-convex networks to input-invex networks [52] and global optimization networks [80] so as to maintain the benign optimization properties of input-convexity. The authors of Siahkamari et al. [59] present algorithms for efficiently learning convex functions, while Chen et al. [16], Kim and Kim [34] derive universal approximation theorems for input-convex neural networks in the convex regression setting. The work Sivaprasad et al. [60] shows that input-convex neural networks do not suffer from overfitting, and generalize better than multilayer perceptrons on common benchmark datasets. In this work, we incorporate input-convex neural networks as a part of our feature-convex architecture and leverage convexity properties to derive novel robustness guarantees.

### 1.3 Notations

The sets of natural numbers, real numbers, and nonnegative real numbers are denoted by  $\mathbb{N}$ ,  $\mathbb{R}$ , and  $\mathbb{R}_+$  respectively. The  $d \times d$  identity matrix is written as  $I_d \in \mathbb{R}^{d \times d}$ , and the identity map on  $\mathbb{R}^d$  is denoted by  $\text{Id}: x \mapsto x$ . For  $A \in \mathbb{R}^{n \times d}$ , we define  $|A| \in \mathbb{R}^{n \times d}$  by  $|A|_{ij} = |A_{ij}|$  for all  $i, j$ , and we write  $A \geq 0$  if and only if  $A_{ij} \geq 0$  for all  $i, j$ . The  $\ell_p$ -norm on  $\mathbb{R}^d$  is given by  $\|\cdot\|_p: x \mapsto (|x_1|^p + \dots + |x_d|^p)^{1/p}$  for  $p \in [1, \infty)$  and by  $\|\cdot\|_p: x \mapsto \max\{|x_1|, \dots, |x_d|\}$  for  $p = \infty$ . The dual norm of  $\|\cdot\|_p$  is denoted by  $\|\cdot\|_{p,*}$ . The convex hull of a set  $X \subseteq \mathbb{R}^d$  is denoted by  $\text{conv}(X)$ . The subdifferential of a convex function  $g: \mathbb{R}^d \rightarrow \mathbb{R}$  at  $x \in \mathbb{R}^d$  is denoted by  $\partial g(x)$ . If  $\epsilon: \Omega \rightarrow \mathbb{R}^d$  is a random variable on a probability space  $(\Omega, \mathcal{B}, \mathbb{P})$  and  $P$  is a predicate defined on  $\mathbb{R}^d$ , then we write  $\mathbb{P}(P(\epsilon))$  to mean  $\mathbb{P}(\{\omega \in \Omega : P(\epsilon(\omega))\})$ . Lebesgue measure on  $\mathbb{R}^d$  is denoted by  $m$ . We define  $\text{ReLU}: \mathbb{R} \rightarrow \mathbb{R}$  as  $\text{ReLU}(x) = \max\{0, x\}$ , and if  $x \in \mathbb{R}^d$ ,  $\text{ReLU}(x)$  denotes  $(\text{ReLU}(x_1), \dots, \text{ReLU}(x_d))$ . We recall the threshold function  $T_\tau: \mathbb{R} \rightarrow \{1, 2\}$  defined by (1), and we define  $T = T_0$ . For a function  $\varphi: \mathbb{R}^d \rightarrow \mathbb{R}^q$  and  $p \in [1, \infty]$ , we define  $\text{Lip}_p(\varphi) = \inf\{K \geq 0 : \|\varphi(x) - \varphi(x')\|_p \leq K\|x - x'\|_p \text{ for all } x, x' \in \mathbb{R}^d\}$ , and if  $\text{Lip}_p(\varphi) < \infty$  we say that  $\varphi$  is Lipschitz continuous with constant  $\text{Lip}_p(\varphi)$  (with respect to the  $\ell_p$ -norm).

## 2 Feature-Convex Classifiers

Let  $d, q \in \mathbb{N}$  and  $p \in [1, \infty]$  be fixed, and consider the task of classifying inputs from a subset of  $\mathbb{R}^d$  into a fixed set of classes  $\mathcal{Y} \subseteq \mathbb{N}$ . In what follows, we restrict to the binary setting where  $\mathcal{Y} = \{1, 2\}$  and class 1 is the sensitive class for which we desire robustness certificates (Section 1). In Appendix A, we briefly discuss avenues to generalize our framework to multiclass settings using one-versus-all and sequential classification methodologies and provide a proof-of-concept example for the Maling dataset.

We now formally define the classifiers considered in this work. Note that the classification threshold  $\tau$  discussed in Section 1.1 is omitted for simplicity.

**Definition 2.1.** Let  $f: \mathbb{R}^d \rightarrow \{1, 2\}$  be defined by  $f(x) = T(g(\varphi(x)))$  for some  $\varphi: \mathbb{R}^d \rightarrow \mathbb{R}^q$  and some  $g: \mathbb{R}^q \rightarrow \mathbb{R}$ . Then  $f$  is said to be a *feature-convex classifier* if the *feature map*  $\varphi$  is Lipschitz continuous with constant  $\text{Lip}_p(\varphi) < \infty$  and  $g$  is a convex function.

We denote the class of all feature-convex classifiers by  $\mathcal{F}$ . Furthermore, for  $q = d$ , the subclass of all feature-convex classifiers with  $\varphi = \text{Id}$  is denoted by  $\mathcal{F}_{\text{Id}}$ .

As we will see in Section 3.1, defining our classifiers using the composition of a convex classifier with a Lipschitz feature map enables the fast computation of certified regions in the input space. This naturally arises from the global underestimation of convex functions by first-order Taylor approximations. Since sublevel sets of such  $g$  are restricted to be convex, the feature map  $\varphi$  is included to increase the representation power of our architecture (see Appendix B for a motivating example). In practice, we find that it suffices to choose  $\varphi$  to be a simple map with a small closed-form Lipschitz constant. For example, in our experiments that follow with  $q = 2d$ , we choose  $\varphi(x) = (x - \mu, |x - \mu|)$  with a constant channel-wise dataset mean  $\mu$ , yielding  $\text{Lip}_1(\varphi) \leq 2$ ,  $\text{Lip}_2(\varphi) \leq \sqrt{2}$ , and  $\text{Lip}_\infty(\varphi) \leq 1$ . Although this particular choice of  $\varphi$  is convex, the function  $g$

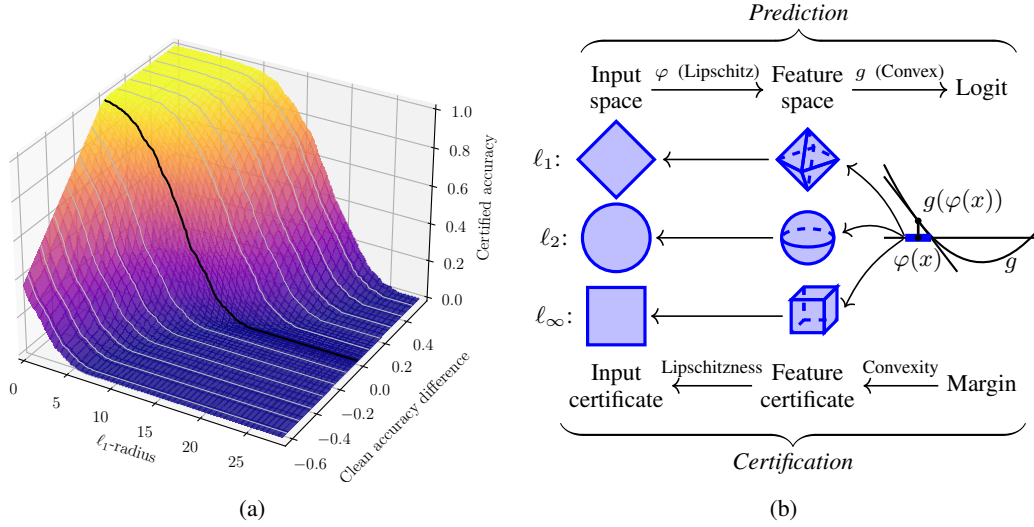

Figure 1: (a) The asymmetric certified accuracy surface  $\Gamma(r, \tau)$  for MNIST 3-8, as described in Section 1.1. The “clean accuracy difference” axis plots  $\alpha_1(\tau) - \alpha_2(\tau)$ , and the black line highlights the certified robustness curve for when clean accuracy is equal across the two classes. (b) Illustration of feature-convex classifiers and their certification. Since  $g$  is convex, it is globally underapproximated by its tangent plane at  $\varphi(x)$ , yielding certified sets for norm balls in the higher-dimensional feature space. Lipschitzness of  $\varphi$  then yields appropriately scaled certificates in the original input space.

need not be monotone, and therefore the composition  $g \circ \varphi$  is nonconvex in general. The prediction and certification of feature-convex classifiers are illustrated in Figure 1b.

In practice, we implement feature-convex classifiers using parameterizations of  $g$ , which we now make explicit. Following Amos et al. [2], we instantiate  $g$  as a neural network with nonnegative weight matrices and nondecreasing convex nonlinearities. Specifically, we consider ReLU nonlinearities, which is not restrictive, as our universal approximation result in Theorem 3.6 proves.

**Definition 2.2.** A *feature-convex ReLU neural network* is a function  $\hat{f}: \mathbb{R}^d \rightarrow \{1, 2\}$  defined by  $\hat{f}(x) = T(\hat{g}(\varphi(x)))$  with  $\varphi: \mathbb{R}^d \rightarrow \mathbb{R}^q$  Lipschitz continuous with constant  $\text{Lip}_p(\varphi) < \infty$  and  $\hat{g}: \mathbb{R}^q \rightarrow \mathbb{R}$  defined by

$$\hat{g}(x^{(0)}) = A^{(L)}x^{(L-1)} + b^{(L)} + C^{(L)}x^{(0)}, \quad x^{(l)} = \text{ReLU} \left( A^{(l)}x^{(l-1)} + b^{(l)} + C^{(l)}x^{(0)} \right),$$

for all  $l \in \{2, 3, \dots, L-1\}$  for some  $L \in \mathbb{N}$ ,  $L > 1$ , and for some consistently sized matrices  $A^{(l)}, C^{(l)}$  and vectors  $b^{(l)}$  satisfying  $A^{(l)} \geq 0$  for all  $l \in \{2, 3, \dots, L\}$ .

Going forward, we denote the class of all feature-convex ReLU neural networks by  $\hat{\mathcal{F}}$ . Furthermore, if  $q = d$ , the subclass of all feature-convex ReLU neural networks with  $\varphi = \text{Id}$  is denoted by  $\hat{\mathcal{F}}_{\text{Id}}$ , which corresponds to the input-convex ReLU neural networks proposed in Amos et al. [2].

For every  $\hat{f} \in \hat{\mathcal{F}}$ , it holds that  $\hat{g}$  is convex due to the rules for composition and nonnegatively weighted sums of convex functions [13, Section 3.2], and therefore  $\hat{\mathcal{F}} \subseteq \mathcal{F}$  and  $\hat{\mathcal{F}}_{\text{Id}} \subseteq \mathcal{F}_{\text{Id}}$ . The “passthrough” weights  $C^{(l)}$  were originally included by Amos et al. [2] to improve the practical performance of the architecture. In some of our more challenging experiments that follow, we remove these passthrough operations and instead add residual identity mappings between hidden layers, which also preserves convexity. We note that the transformations defined by  $A^{(l)}$  and  $C^{(l)}$  can be taken to be convolutions, which are nonnegatively weighted linear operations and thus preserve convexity [2].

### 3 Certification and Analysis of Feature-Convex Classifiers

We begin by deriving asymmetric robustness certificates for our feature-convex classifier in Section 3.1. In Section 3.2, we introduce convexly separable sets and theoretically analyze the clean

performance of our classifiers through this lens. Namely, we show that there exists a feature-convex classifier with  $\varphi = \text{Id}$  that perfectly classifies the CIFAR-10 cats-dogs training dataset. We show that this strong learning capacity generalizes by proving that feature-convex classifiers can perfectly fit high-dimensional uniformly distributed data with high probability.

### 3.1 Certified Robustness Guarantees

In this section, we address the asymmetric certified robustness problem by providing class 1 robustness certificates for feature-convex classifiers  $f \in \mathcal{F}$ . Such robustness corresponds to proving the absence of false negatives in the case that class 1 represents positives and class 2 represents negatives. For example, if in a malware detection setting class 1 represents malware and class 2 represents non-malware, the following certificate gives a lower bound on the magnitude of the malware file alteration needed in order to misclassify the file as non-malware.

**Theorem 3.1.** *Let  $f \in \mathcal{F}$  be as in Definition 2.1 and let  $x \in f^{-1}(\{1\}) = \{x' \in \mathbb{R}^d : f(x') = 1\}$ . If  $\nabla g(\varphi(x)) \in \mathbb{R}^q$  is a nonzero subgradient of the convex function  $g$  at  $\varphi(x)$ , then  $f(x + \delta) = 1$  for all  $\delta \in \mathbb{R}^d$  such that*

$$\|\delta\|_p < r(x) := \frac{g(\varphi(x))}{\text{Lip}_p(\varphi) \|\nabla g(\varphi(x))\|_{p,*}}.$$

**Remark 3.2.** For  $f \in \mathcal{F}$  and  $x \in f^{-1}(\{1\})$ , a subgradient  $\nabla g(\varphi(x)) \in \mathbb{R}^q$  of  $g$  always exists at  $\varphi(x)$ , since the subdifferential  $\partial g(\varphi(x))$  is a nonempty closed bounded convex set, as  $g$  is a finite convex function on all of  $\mathbb{R}^q$ —see Theorem 23.4 in Rockafellar [56] and the discussion thereafter. Furthermore, if  $f$  is not a constant classifier, such a subgradient  $\nabla g(\varphi(x))$  must necessarily be nonzero, since, if it were zero, then  $g(y) \geq g(\varphi(x)) + \nabla g(\varphi(x))^\top (y - \varphi(x)) = g(\varphi(x)) > 0$  for all  $y \in \mathbb{R}^q$ , implying that  $f$  identically predicts class 1, which is a contradiction. Thus, the certified radius given in Theorem 3.1 is always well-defined in practical settings.

Theorem 3.1 is derived from the fact that a convex function is globally underapproximated by any tangent plane. The nonconstant terms in Theorem 3.1 afford an intuitive interpretation: the radius scales proportionally to the confidence  $g(\varphi(x))$  and inversely with the input sensitivity  $\|\nabla g(\varphi(x))\|_{p,*}$ . In practice,  $\text{Lip}_p(\varphi)$  can be made quite small as mentioned in Section 2, and furthermore the subgradient  $\nabla g(\varphi(x))$  is easily evaluated as the Jacobian of  $g$  at  $\varphi(x)$  using standard automatic differentiation packages. This provides fast, deterministic class 1 certificates for any  $\ell_p$ -norm without modification of the feature-convex network’s training procedure or architecture.

### 3.2 Representation Power Characterization

We now restrict our analysis to the class  $\mathcal{F}_{\text{Id}}$  of feature-convex classifiers with an identity feature map. This can be equivalently considered as the class of classifiers for which the input-to-logit map is convex. We therefore refer to models in  $\mathcal{F}_{\text{Id}}$  as *input-convex classifiers*. While the feature map  $\varphi$  is useful in boosting the practical performance of our classifiers, the theoretical results in this section suggest that there is significant potential in using input-convex classifiers as a standalone solution.

**Classifying convexly separable sets.** We begin by introducing the notion of convexly separable sets, which are intimately related to decision regions representable by the class  $\mathcal{F}_{\text{Id}}$ .

**Definition 3.3.** Let  $X_1, X_2 \subseteq \mathbb{R}^d$ . The ordered pair  $(X_1, X_2)$  is said to be *convexly separable* if there exists a nonempty closed convex set  $X \subseteq \mathbb{R}^d$  such that  $X_2 \subseteq X$  and  $X_1 \subseteq \mathbb{R}^d \setminus X$ .

Notice that it may be the case that a pair  $(X_1, X_2)$  is convexly separable yet the pair  $(X_2, X_1)$  is not. Although low-dimensional intuition may cause concerns regarding the convex separability of sets of binary-labeled data, we will soon see in Theorem 3.9 that, even for relatively unstructured data distributions, binary datasets are actually convexly separable in high dimensions with high probability. We now show that convexly separable datasets possess the property that they may always be perfectly fit by input-convex classifiers.

**Proposition 3.4.** *For any nonempty closed convex set  $X \subseteq \mathbb{R}^d$ , there exists  $f \in \mathcal{F}_{\text{Id}}$  such that  $X = f^{-1}(\{2\}) = \{x \in \mathbb{R}^d : f(x) = 2\}$ . In particular, this shows that if  $(X_1, X_2)$  is a convexly separable pair of subsets of  $\mathbb{R}^d$ , then there exists  $f \in \mathcal{F}_{\text{Id}}$  such that  $f(x) = 1$  for all  $x \in X_1$  and  $f(x) = 2$  for all  $x \in X_2$ .*

We also show that the converse of Proposition 3.4 holds: the geometry of the decision regions of classifiers in  $\mathcal{F}_{\text{Id}}$  consists of a convex set and its complement.

**Proposition 3.5.** *Let  $f \in \mathcal{F}_{\text{Id}}$ . The decision region under  $f$  associated to class 2, namely  $X := f^{-1}(\{2\}) = \{x \in \mathbb{R}^d : f(x) = 2\}$ , is a closed convex set.*

Note that this is not necessarily true for our more general feature-convex architectures with  $\varphi \neq \text{Id}$ . We continue our theoretical analysis of input-convex classifiers by extending the universal approximation theorem for regressing upon real-valued convex functions (given in Chen et al. [16]) to the classification setting. In particular, Theorem 3.6 below shows that any input-convex classifier  $f \in \mathcal{F}_{\text{Id}}$  can be approximated arbitrarily well on any compact set by ReLU neural networks with nonnegative weights. Here, “arbitrarily well” means that the set of inputs where the neural network prediction differs from that of  $f$  can be made to have arbitrarily small Lebesgue measure.

**Theorem 3.6.** *For any  $f \in \mathcal{F}_{\text{Id}}$ , any compact convex subset  $X$  of  $\mathbb{R}^d$ , and any  $\epsilon > 0$ , there exists  $\hat{f} \in \hat{\mathcal{F}}_{\text{Id}}$  such that  $m(\{x \in X : \hat{f}(x) \neq f(x)\}) < \epsilon$ .*

An extension of the proof of Theorem 3.6 combined with Proposition 3.4 yields that input-convex ReLU neural networks can perfectly fit convexly separable sampled datasets.

**Theorem 3.7.** *If  $(X_1, X_2)$  is a convexly separable pair of finite subsets of  $\mathbb{R}^d$ , then there exists  $\hat{f} \in \hat{\mathcal{F}}_{\text{Id}}$  such that  $\hat{f}(x) = 1$  for all  $x \in X_1$  and  $\hat{f}(x) = 2$  for all  $x \in X_2$ .*

Theorems 3.6 and 3.7 theoretically justify the particular parameterization in Definition 2.2 for learning feature-convex classifiers to fit convexly separable data.

**Empirical convex separability.** Interestingly, we find empirically that high-dimensional image training data is convexly separable. We illustrate this in Appendix D by attempting to reconstruct a CIFAR-10 cat image from a convex combination of the dogs and vice versa; the error is significantly positive for every sample in the training dataset, and image reconstruction is visually poor. This fact, combined with Theorem 3.7, immediately yields the following result.

**Corollary 3.8.** *There exists  $\hat{f} \in \hat{\mathcal{F}}_{\text{Id}}$  such that  $\hat{f}$  achieves perfect training accuracy for the unaugmented CIFAR-10 cats-versus-dogs dataset.*

The gap between this theoretical guarantee and our practical performance is large; without the feature map, our CIFAR-10 cats-dogs classifier achieves just 73.4% training accuracy (Table 3). While high training accuracy may not necessarily imply strong test set performance, Corollary 3.8 demonstrates that the typical deep learning paradigm of overfitting to the training dataset is attainable and that there is at least substantial room for improvement in the design and optimization of input-convex classifiers [50]. We leave the challenge of overfitting to the CIFAR-10 cats-dogs training data with an input-convex classifier as an open research problem for the field.

**Convex separability in high dimensions.** We conclude by investigating *why* the convex separability property that allows for Corollary 3.8 may hold for natural image datasets. We argue that dimensionality facilitates this phenomenon by showing that data is easily separated by some  $f \in \hat{\mathcal{F}}_{\text{Id}}$  when  $d$  is sufficiently large. In particular, although it may seem restrictive to rely on models in  $\hat{\mathcal{F}}_{\text{Id}}$  with convex class 2 decision regions, we show in Theorem 3.9 below that even uninformative data distributions that are seemingly difficult to classify may be fit by such models with high probability as the dimensionality of the data increases.

**Theorem 3.9.** *Consider  $M, N \in \mathbb{N}$ . Let  $X_1 = \{x^{(1)}, \dots, x^{(M)}\} \subseteq \mathbb{R}^d$  and  $X_2 = \{y^{(1)}, \dots, y^{(N)}\} \subseteq \mathbb{R}^d$  be samples with all elements  $x_k^{(i)}, y_l^{(j)}$  drawn independently and identically from the uniform probability distribution on  $[-1, 1]$ . Then, it holds that*

$$\mathbb{P}((X_1, X_2) \text{ is convexly separable}) \geq \begin{cases} 1 - \left(1 - \frac{M!N!}{(M+N)!}\right)^d & \text{for all } d \in \mathbb{N}, \\ 1 & \text{if } d \geq M + N. \end{cases} \quad (2)$$

In particular,  $\hat{\mathcal{F}}_{\text{Id}}$  contains an input-convex ReLU neural network that classifies all  $x^{(i)}$  into class 1 and all  $y^{(j)}$  into class 2 almost surely for sufficiently large dimensions  $d$ .

Although the uniformly distributed data in Theorem 3.9 is unrealistic in practice, the result demonstrates that the class  $\hat{\mathcal{F}}_{\text{Id}}$  of input-convex ReLU neural networks has sufficient complexity to fit even the most unstructured data in high dimensions. Despite this ability, researchers have found that current input-convex neural networks tend to not overfit in practice, yielding small generalization gaps relative to conventional neural networks [60]. Achieving the modern deep learning paradigm of overfitting to the training dataset with input-convex networks is an exciting open challenge [50].

## 4 Experiments

This section compares our feature-convex classifiers against a variety of state-of-the-art baselines in the asymmetric setting. Descriptions of the considered datasets and further experimental setup details are deferred to Appendix E. Clean class accuracies are balanced as described in Section 1.1 and Appendix E.4.

Experimental results for  $\ell_1$ -norm balls are reported in Figure 2, where our feature-convex classifier radii are similar or better than all other baselines across all datasets. Due to space constraints, we defer the corresponding plots for  $\ell_2$ - and  $\ell_\infty$ -norm balls to Appendix F, where our certified radii are not dominant but still comparable to methods tailored specifically for a particular norm. We accomplish this while maintaining completely deterministic, closed-form certificates with orders-of-magnitude faster computation time than competitive baselines.

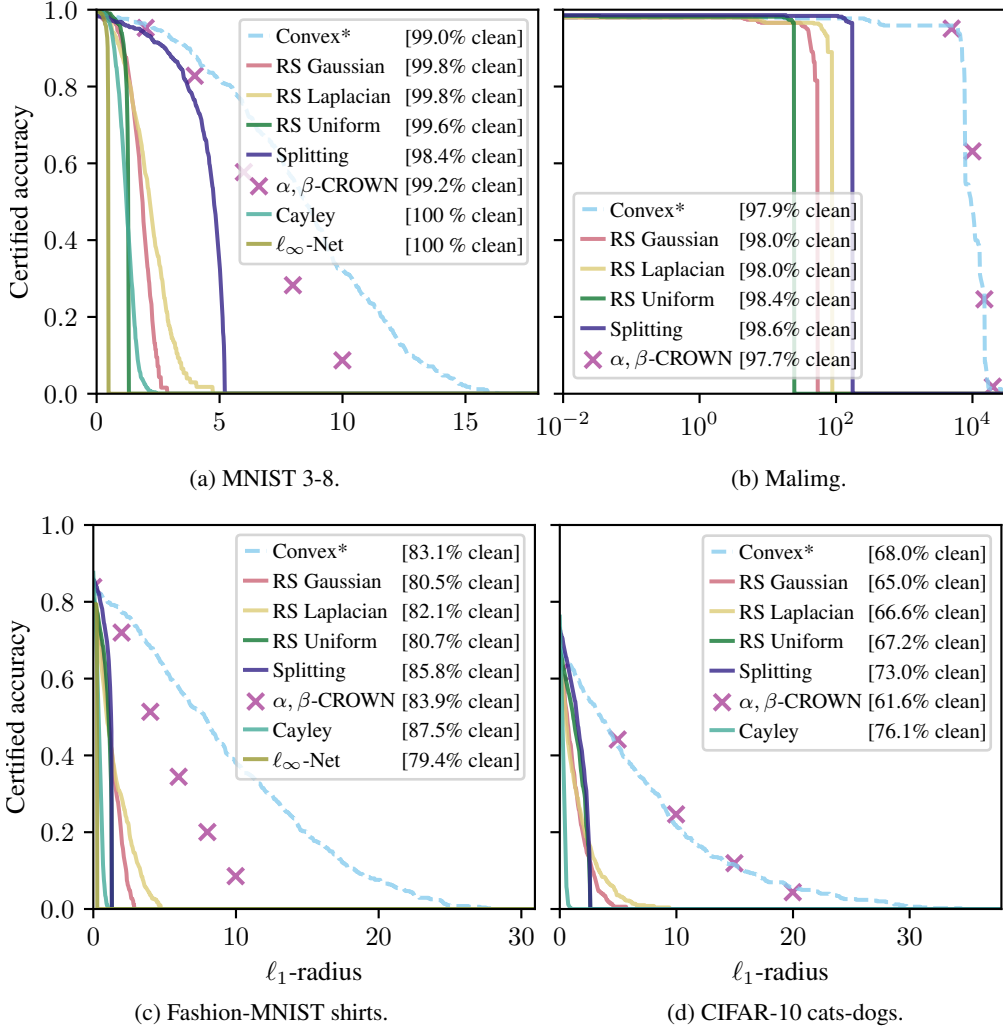

Figure 2: Class 1 certified radii curves for the  $\ell_1$ -norm. Note the log-scale on the Maling plot.



For the MNIST 3-8 and Maling datasets (Figures 2a and 2b), all methods achieve high clean test accuracy. Our  $\ell_1$ -radii scale exceptionally well with the dimensionality of the input, with two orders of magnitude improvement over smoothing baselines for the Maling dataset. The Maling certificates in particular have an interesting concrete interpretation. As each pixel corresponds to one byte in the original malware file, an  $\ell_1$ -certificate of radius  $r$  provides a robustness certificate for up to  $r$  bytes in the file. Namely, even if a malware designer were to arbitrarily change  $r$  malware bytes, they would be unable to fool our classifier into returning a false negative. This may not have an immediate practical impact as small semantic changes (e.g., reordering unrelated instructions) could induce large  $\ell_p$ -norm shifts. However, as randomized smoothing was extended from pixel-space to semantic transformations [42], we expect that similar extensions can produce practical certifiably robust malware classifiers.

While our method produces competitive robustness certificates for  $\ell_2$ - and  $\ell_\infty$ -norms (Appendix F), it offers the largest improvement for  $\ell_1$ -certificates in the high-dimensional image spaces considered. This is likely due to the characteristics of the subgradient dual norm factor in the denominator of Theorem 3.1. The dual of the  $\ell_1$ -norm is the  $\ell_\infty$ -norm, which selects the largest magnitude element in the gradient of the output logit with respect to the input pixels. As the input image scales, it is natural for the classifier to become less dependent on any one specific pixel, shrinking the denominator in Theorem 3.1. Conversely, when certifying for the  $\ell_\infty$ -norm, one must evaluate the  $\ell_1$ -norm of the gradient, which scales proportionally to the input size. Nevertheless, we find in Appendix F that our  $\ell_2$ - and  $\ell_\infty$ -radii are generally comparable those of the baselines while maintaining speed and determinism.

Our feature-convex neural network certificates are almost immediate, requiring just one forward pass and one backward pass through the network. This certification procedure requires fewer than 10 milliseconds per sample on our hardware and scales well with network size. This is substantially faster than the runtime for randomized smoothing, which scales from several seconds per CIFAR-10 image to minutes for an ImageNet image [18]. The only method that rivaled our  $\ell_1$ -norm certificates was  $\alpha, \beta$ -CROWN; however, such bound propagation frameworks suffer from exponential computational complexity in network size, and even for small CIFAR-10 ConvNets typically take on the order of minutes to certify nontrivial radii.

Unlike the randomized smoothing baselines, our method is completely deterministic in both prediction and certification. Randomized prediction poses a particular problem for randomized smoothing certificates: even for a perturbation of a “certified” magnitude, repeated evaluations at the perturbed point will eventually yield misclassification for any nontrivial classifier. While the splitting-based certificates of Levine and Feizi [40] are deterministic, they only certify quantized (not continuous)  $\ell_1$ -perturbations, which scale poorly to  $\ell_2$ - and  $\ell_\infty$ -certificates (Appendix F). Furthermore, the certification runtime grows linearly in the smoothing noise  $\sigma$ ; evaluating the certified radii at  $\sigma$  used for the Maling experiment takes several minutes per sample.

Ablation tests examining the impact of Jacobian regularization, the feature map  $\varphi$ , and data augmentation are included in Appendix G. We illustrate the certification performance of our method across all combinations of MNIST classes in Appendix H.

## 5 Conclusion

This work introduces the problem of asymmetric certified robustness, which we show naturally applies to a number of practical adversarial settings. We define feature-convex classifiers in this context and theoretically characterize their representation power from geometric, approximation theoretic, and statistical lenses. Closed-form sensitive-class certified robust radii for the feature-convex architecture are provided for arbitrary  $\ell_p$ -norms. We find that our  $\ell_1$ -robustness certificates in particular match or outperform those of the current state-of-the-art methods, with our  $\ell_2$ - and  $\ell_\infty$ -radii also competitive to methods tailored for a particular norm. Unlike smoothing and bound propagation baselines, we accomplish this with a completely deterministic and near-immediate computation scheme. We also show theoretically that significant performance improvements should be realizable for natural image datasets such as CIFAR-10 cats-versus-dogs. Possible directions for future research include bridging the gap between the theoretical power of feature-convex models and their practical implementation, as well as exploring more sophisticated choices of the feature map  $\varphi$ .

## References

- [1] Filippo Amato, Alberto López, Eladia María Peña-Méndez, Petr Vaňhara, Aleš Hampl, and Josef Havel. Artificial neural networks in medical diagnosis. *Journal of Applied Biomedicine*, 11(2):47–58, 2013.
- [2] Brandon Amos, Lei Xu, and J Zico Kolter. Input convex neural networks. In *International Conference on Machine Learning*, pages 146–155. PMLR, 2017.
- [3] Brendon G. Anderson and Somayeh Sojoudi. Certified robustness via locally biased randomized smoothing. In *Learning for Dynamics and Control*. PMLR, 2022.
- [4] Brendon G. Anderson, Ziyi Ma, Jingqi Li, and Somayeh Sojoudi. Tightened convex relaxations for neural network robustness certification. In *Proceedings of the 59th IEEE Conference on Decision and Control*, 2020.
- [5] Brendon G. Anderson, Samuel Pfrommer, and Somayeh Sojoudi. Towards optimal randomized smoothing: A semi-infinite linear programming approach. In *ICML Workshop on Formal Verification of Machine Learning*, 2022.
- [6] MOSEK ApS. *The MOSEK optimization toolbox for MATLAB manual. Version 9.0.*, 2019. URL <http://docs.mosek.com/9.0/toolbox/index.html>.
- [7] Anish Athalye, Nicholas Carlini, and David Wagner. Obfuscated gradients give a false sense of security: Circumventing defenses to adversarial examples. In *International Conference on Machine Learning*, pages 274–283. PMLR, 2018.
- [8] Stanley Bak, Changliu Liu, and Taylor Johnson. The second international verification of neural networks competition (VNN-COMP 2021): Summary and results. *arXiv preprint arXiv:2109.00498*, 2021.
- [9] Randall Balestriero, Jerome Pesenti, and Yann LeCun. Learning in high dimension always amounts to extrapolation. *arXiv preprint arXiv:2110.09485*, 2021.
- [10] Dimitri Bertsekas. *Nonlinear Programming*. Athena Scientific, 3rd edition, 2016.
- [11] Battista Biggio, Iginio Corona, Davide Maiorca, Blaine Nelson, Nedim Šrđić, Pavel Laskov, Giorgio Giacinto, and Fabio Roli. Evasion attacks against machine learning at test time. In *Joint European Conference on Machine Learning and Knowledge Discovery in Databases*, pages 387–402. Springer, 2013.
- [12] Mariusz Bojarski, Davide Del Testa, Daniel Dworakowski, Bernhard Firner, Beat Flepp, Praseen Goyal, Lawrence D. Jackel, Mathew Monfort, Urs Muller, Jiakai Zhang, et al. End to end learning for self-driving cars. *arXiv preprint arXiv:1604.07316*, 2016.
- [13] Stephen Boyd and Lieven Vandenberghe. *Convex Optimization*. Cambridge University Press, 2004.
- [14] Nicholas Carlini and David Wagner. Adversarial examples are not easily detected: Bypassing ten detection methods. In *Proceedings of the 10th ACM Workshop on Artificial Intelligence and Security*, pages 3–14, 2017.
- [15] Francesco Cartella, Orlando Anunciacao, Yuki Funabiki, Daisuke Yamaguchi, Toru Akishita, and Olivier Elshocht. Adversarial attacks for tabular data: Application to fraud detection and imbalanced data. *arXiv preprint arXiv:2101.08030*, 2021.
- [16] Yize Chen, Yuanyuan Shi, and Baosen Zhang. Optimal control via neural networks: A convex approach. In *International Conference on Learning Representations*, 2019.
- [17] Yize Chen, Yuanyuan Shi, and Baosen Zhang. Data-driven optimal voltage regulation using input convex neural networks. *Electric Power Systems Research*, 189:106741, 2020.
- [18] Jeremy Cohen, Elan Rosenfeld, and Zico Kolter. Certified adversarial robustness via randomized smoothing. In *International Conference on Machine Learning*, pages 1310–1320. PMLR, 2019.

- [19] Stefano Cresci, Marinella Petrocchi, Angelo Spognardi, and Stefano Tognazzi. Adversarial machine learning for protecting against online manipulation. *IEEE Internet Computing*, 26(2): 47–52, 2021.
- [20] Nilesh Dalvi, Pedro Domingos, Sumit Sanghai, and Deepak Verma. Adversarial classification. In *Proceedings of the tenth ACM SIGKDD international conference on Knowledge discovery and data mining*, pages 99–108, 2004.
- [21] Francisco Eiras, Motasem Alfarra, M Pawan Kumar, Philip HS Torr, Puneet K Dokania, Bernard Ghanem, and Adel Bibi. ANCER: Anisotropic certification via sample-wise volume maximization. *arXiv preprint arXiv:2107.04570*, 2021.
- [22] Kevin Eykholt, Ivan Evtimov, Earlence Fernandes, Bo Li, Amir Rahmati, Chaowei Xiao, Atul Prakash, Tadayoshi Kohno, and Dawn Song. Robust physical-world attacks on deep learning visual classification. In *Proceedings of the IEEE Conference on Computer Vision and Pattern Recognition*, pages 1625–1634, 2018.
- [23] Mahyar Fazlyab, Alexander Robey, Hamed Hassani, Manfred Morari, and George Pappas. Efficient and accurate estimation of Lipschitz constants for deep neural networks. *Advances in Neural Information Processing Systems*, 32, 2019.
- [24] Samuel G Finlayson, John D Bowers, Joichi Ito, Jonathan L Zittrain, Andrew L Beam, and Isaac S Kohane. Adversarial attacks on medical machine learning. *Science*, 363(6433):1287–1289, 2019.
- [25] William Fleshman, Edward Raff, Jared Sylvester, Steven Forsyth, and Mark McLean. Non-negative networks against adversarial attacks. *arXiv preprint arXiv:1806.06108*, 2018.
- [26] Felipe O Giuste and Juan C Vizcarra. CIFAR-10 image classification using feature ensembles. *arXiv preprint arXiv:2002.03846*, 2020.
- [27] Edita Grolman, Hodaya Binyamini, Asaf Shabtai, Yuval Elovici, Ikuya Morikawa, and Toshiya Shimizu. HateVersarial: Adversarial attack against hate speech detection algorithms on Twitter. In *Proceedings of the 30th ACM Conference on User Modeling, Adaptation and Personalization*, pages 143–152, 2022.
- [28] Kathrin Grosse, Nicolas Papernot, Praveen Manoharan, Michael Backes, and Patrick McDaniel. Adversarial examples for malware detection. In *European Symposium on Research in Computer Security*, pages 62–79. Springer, 2017.
- [29] Matthias Hein and Maksym Andriushchenko. Formal guarantees on the robustness of a classifier against adversarial manipulation. *Advances in Neural Information Processing Systems*, 30, 2017.
- [30] Tien Ho-Phuoc. CIFAR10 to compare visual recognition performance between deep neural networks and humans. *arXiv preprint arXiv:1811.07270*, 2018.
- [31] Judy Hoffman, Daniel A Roberts, and Sho Yaida. Robust learning with Jacobian regularization. *arXiv preprint arXiv:1908.02729*, 2019.
- [32] Íñigo Íncer Romeo, Michael Theodorides, Sadia Afroz, and David Wagner. Adversarially robust malware detection using monotonic classification. In *Proceedings of the Fourth ACM International Workshop on Security and Privacy Analytics*, pages 54–63, 2018.
- [33] Mohammed Kayed, Ahmed Anter, and Hadeer Mohamed. Classification of garments from fashion MNIST dataset using CNN LeNet-5 architecture. In *2020 International Conference on Innovative Trends in Communication and Computer Engineering (ITCE)*, pages 238–243. IEEE, 2020.
- [34] Jinrae Kim and Youdan Kim. Parameterized convex universal approximators for decision-making problems. *IEEE Transactions on Neural Networks and Learning Systems*, 2022.
- [35] Alex Krizhevsky, Geoffrey Hinton, et al. Learning multiple layers of features from tiny images. 2009.

- [36] Alexey Kurakin, Ian Goodfellow, and Samy Bengio. Adversarial machine learning at scale. In *International Conference on Learning Representations*, 2017.
- [37] Yann LeCun. The MNIST database of handwritten digits. <http://yann.lecun.com/exdb/mnist/>, 1998.
- [38] Mathias Lecuyer, Vaggelis Atlidakis, Roxana Geambasu, Daniel Hsu, and Suman Jana. Certified robustness to adversarial examples with differential privacy. In *IEEE Symposium on Security and Privacy*, pages 656–672. IEEE, 2019.
- [39] Alexander Levine and Soheil Feizi. Wasserstein smoothing: Certified robustness against Wasserstein adversarial attacks. In *International Conference on Artificial Intelligence and Statistics*, pages 3938–3947. PMLR, 2020.
- [40] Alexander J Levine and Soheil Feizi. Improved, deterministic smoothing for  $\ell_1$  certified robustness. In *International Conference on Machine Learning*, pages 6254–6264. PMLR, 2021.
- [41] Bai Li, Changyou Chen, Wenlin Wang, and Lawrence Carin. Certified adversarial robustness with additive noise. In *Advances in Neural Information Processing Systems*, volume 32, 2019.
- [42] Linyi Li, Maurice Weber, Xiaojun Xu, Luka Rimanic, Bhavya Kailkhura, Tao Xie, Ce Zhang, and Bo Li. Tss: Transformation-specific smoothing for robustness certification. In *Proceedings of the 2021 ACM SIGSAC Conference on Computer and Communications Security*, pages 535–557, 2021.
- [43] Aishan Liu, Xianglong Liu, Jiaxin Fan, Yuqing Ma, Anlan Zhang, Huiyuan Xie, and Dacheng Tao. Perceptual-sensitive GAN for generating adversarial patches. In *Proceedings of the AAAI Conference on Artificial Intelligence*, volume 33, pages 1028–1035, 2019.
- [44] Qun Liu and Supratik Mukhopadhyay. Unsupervised learning using pretrained cnn and associative memory bank. In *2018 International Joint Conference on Neural Networks (IJCNN)*, pages 01–08. IEEE, 2018.
- [45] Daniel Lowd and Christopher Meek. Good word attacks on statistical spam filters. In *CEAS*, volume 2005, 2005.
- [46] Ziyi Ma and Somayeh Sojoudi. A sequential framework towards an exact SDP verification of neural networks. In *2021 IEEE 8th International Conference on Data Science and Advanced Analytics (DSAA)*, pages 1–8. IEEE, 2021.
- [47] Aleksander Madry, Aleksandar Makelov, Ludwig Schmidt, Dimitris Tsipras, and Adrian Vladu. Towards deep learning models resistant to adversarial attacks. In *International Conference on Learning Representations*, 2018.
- [48] Ashok Makkuva, Amirhossein Taghvaei, Sewoong Oh, and Jason Lee. Optimal transport mapping via input convex neural networks. In *International Conference on Machine Learning*, pages 6672–6681. PMLR, 2020.
- [49] Mark Niklas Müller, Christopher Brix, Stanley Bak, Changliu Liu, and Taylor T Johnson. The third international verification of neural networks competition (VNN-COMP 2022): Summary and results. *arXiv preprint arXiv:2212.10376*, 2022.
- [50] Preetum Nakkiran, Gal Kaplun, Yamini Bansal, Tristan Yang, Boaz Barak, and Ilya Sutskever. Deep double descent: Where bigger models and more data hurt. *Journal of Statistical Mechanics: Theory and Experiment*, 2021(12):124003, 2021.
- [51] Lakshmanan Nataraj, Sreejith Karthikeyan, Gregoire Jacob, and Bangalore S Manjunath. Malware images: Visualization and automatic classification. In *Proceedings of the 8th International Symposium on Visualization for Cyber Security*, pages 1–7, 2011.
- [52] Vitali Nesterov, Fabricio Arend Torres, Monika Nagy-Huber, Maxim Samarin, and Volker Roth. Learning invariances with generalised input-convex neural networks. *arXiv preprint arXiv:2204.07009*, 2022.

- [53] Anh Nguyen, Jason Yosinski, and Jeff Clune. Deep neural networks are easily fooled: High confidence predictions for unrecognizable images. In *Proceedings of the IEEE Conference on Computer Vision and Pattern Recognition*, pages 427–436, 2015.
- [54] Samuel Pfrommer, Brendon G. Anderson, and Somayeh Sojoudi. Projected randomized smoothing for certified adversarial robustness. *Preprint*, 2022. URL <https://brendon-anderson.github.io/files/publications/pfrommer2022projected.pdf>.
- [55] Aditi Raghunathan, Jacob Steinhardt, and Percy S Liang. Semidefinite relaxations for certifying robustness to adversarial examples. In *Advances in Neural Information Processing Systems*, pages 10877–10887, 2018.
- [56] R Tyrrell Rockafellar. *Convex Analysis*. Princeton University Press, 1970.
- [57] Amir Mahdi Sadeghzadeh, Saeed Shiravi, and Rasool Jalili. Adversarial network traffic: Towards evaluating the robustness of deep-learning-based network traffic classification. *IEEE Transactions on Network and Service Management*, 18(2):1962–1976, 2021.
- [58] Hadi Salman, Jerry Li, Ilya Razenshteyn, Pengchuan Zhang, Huan Zhang, Sebastien Bubeck, and Greg Yang. Provably robust deep learning via adversarially trained smoothed classifiers. In *Advances in Neural Information Processing Systems*, volume 32, 2019.
- [59] Ali Siahkamari, Durmus Alp Emre Acar, Christopher Liao, Kelly L Geyer, Venkatesh Saligrama, and Brian Kulis. Faster algorithms for learning convex functions. In *International Conference on Machine Learning*, pages 20176–20194. PMLR, 2022.
- [60] Sarath Sivaprasad, Ankur Singh, Naresh Manwani, and Vineet Gandhi. The curious case of convex neural networks. In *Joint European Conference on Machine Learning and Knowledge Discovery in Databases*, pages 738–754. Springer, 2021.
- [61] Christian Szegedy, Wojciech Zaremba, Ilya Sutskever, Joan Bruna, Dumitru Erhan, Ian Goodfellow, and Rob Fergus. Intriguing properties of neural networks. In *International Conference on Learning Representations*, 2014.
- [62] Jiaye Teng, Guang-He Lee, and Yang Yuan.  $\ell_1$  adversarial robustness certificates: A randomized smoothing approach. *Preprint*, 2020. URL <https://openreview.net/forum?id=H1lQIgrFDS>.
- [63] Asher Trockman and J Zico Kolter. Orthogonalizing convolutional layers with the Cayley transform. *arXiv preprint arXiv:2104.07167*, 2021.
- [64] Jonathan Uesato, Brendan O’Donoghue, Pushmeet Kohli, and Aaron Oord. Adversarial risk and the dangers of evaluating against weak attacks. In *International Conference on Machine Learning*, pages 5025–5034. PMLR, 2018.
- [65] Aladin Virmaux and Kevin Scaman. Lipschitz regularity of deep neural networks: Analysis and efficient estimation. *Advances in Neural Information Processing Systems*, 31, 2018.
- [66] Shiqi Wang, Huan Zhang, Kaidi Xu, Xue Lin, Suman Jana, Cho-Jui Hsieh, and J Zico Kolter. Beta-CROWN: Efficient bound propagation with per-neuron split constraints for neural network robustness verification. *Advances in Neural Information Processing Systems*, 34:29909–29921, 2021.
- [67] Lily Weng, Huan Zhang, Hongge Chen, Zhao Song, Cho-Jui Hsieh, Luca Daniel, Duane Boning, and Inderjit Dhillon. Towards fast computation of certified robustness for ReLU networks. In *International Conference on Machine Learning*, pages 5276–5285. PMLR, 2018.
- [68] Eric Wong and Zico Kolter. Provable defenses against adversarial examples via the convex outer adversarial polytope. In *International Conference on Machine Learning*, pages 5286–5295. PMLR, 2018.
- [69] Bichen Wu, Forrest Iandola, Peter H. Jin, and Kurt Keutzer. SqueezeDet: Unified, small, low power fully convolutional neural networks for real-time object detection for autonomous driving. In *Proceedings of the IEEE Conference on Computer Vision and Pattern Recognition Workshops*, pages 129–137, 2017.

- 564 [70] Han Xiao, Kashif Rasul, and Roland Vollgraf. Fashion-MNIST: A novel image dataset for  
565 benchmarking machine learning algorithms. *arXiv preprint arXiv:1708.07747*, 2017.
- 566 [71] Samir S Yadav and Shivajirao M Jadhav. Deep convolutional neural network based medical  
567 image classification for disease diagnosis. *Journal of Big Data*, 6(1):1–18, 2019.
- 568 [72] Greg Yang, Tony Duan, J Edward Hu, Hadi Salman, Ilya Razenshteyn, and Jerry Li. Randomized  
569 smoothing of all shapes and sizes. In *International Conference on Machine Learning*, pages  
570 10693–10705. PMLR, 2020.
- 571 [73] Yao-Yuan Yang, Cyrus Rashtchian, Hongyang Zhang, Russ R Salakhutdinov, and Kamalika  
572 Chaudhuri. A closer look at accuracy vs. robustness. *Advances in Neural Information Processing*  
573 *Systems*, 33:8588–8601, 2020.
- 574 [74] Roozbeh Yousefzadeh. Deep learning generalization and the convex hull of training sets. In  
575 *Neurips Deep Learning through Information Workshop*, 2020.
- 576 [75] Fancheng Zeng, Guanqiu Qi, Zhiqin Zhu, Jian Sun, Gang Hu, and Matthew Haner. Convex  
577 neural networks based reinforcement learning for load frequency control under denial of service  
578 attacks. *Algorithms*, 15(2):34, 2022.
- 579 [76] Runtian Zhai, Chen Dan, Di He, Huan Zhang, Boqing Gong, Pradeep Ravikumar, Cho-Jui  
580 Hsieh, and Liwei Wang. MACER: Attack-free and scalable robust training via maximizing  
581 certified radius. In *International Conference on Learning Representations*, 2020.
- 582 [77] Bohang Zhang, Du Jiang, Di He, and Liwei Wang. Boosting the certified robustness of l-infinity  
583 distance nets. *arXiv preprint arXiv:2110.06850*, 2021.
- 584 [78] Dinghuai Zhang, Mao Ye, Chengyue Gong, Zhanxing Zhu, and Qiang Liu. Black-box certifica-  
585 tion with randomized smoothing: A functional optimization based framework. In *Advances in*  
586 *Neural Information Processing Systems*, volume 33, pages 2316–2326, 2020.
- 587 [79] Ling Zhang, Yize Chen, and Baosen Zhang. A convex neural network solver for DCOPF with  
588 generalization guarantees. *IEEE Transactions on Control of Network Systems*, 2021.
- 589 [80] Sen Zhao, Erez Louidor, and Maya Gupta. Global optimization networks. In *International*  
590 *Conference on Machine Learning*, pages 26927–26957. PMLR, 2022.

# Supplementary Material

## A Classification Framework Generalization

While outside the scope of our work, we note that there are two natural ways to extend our approach to a multiclass setting with one sensitive class. Let  $\mathcal{Y} = \{1, 2, \dots, c\}$ , with class 1 being the sensitive class for which we aim to generate certificates.

One approach involves a two-step architecture, where a feature-convex classifier first distinguishes between the sensitive class 1 and all other classes  $\{2, 3, \dots, c\}$  and an arbitrary second classifier distinguishes between the classes  $\{2, 3, \dots, c\}$ . The first classifier could then be used to generate class 1 certificates, as described in Section 3.1.

Alternatively, we could define  $g$  to map directly to  $c$  output logits, with the first logit convex in the input and the other logits concave in the input. Concavity can be easily achieved by negating the output of a convex network. Let the  $i$ th output logit then be denoted as  $g_i$  and consider an input  $x$  where the classifier predicts class 1 (i.e.,  $g_1(\varphi(x)) \geq g_i(\varphi(x))$  for all  $i \in \{2, 3, \dots, c\}$ ); since the difference of a convex and a concave function is convex, we can generate a certificate for the nonnegativity of each convex decision function  $g_1 \circ \varphi - g_i \circ \varphi$  around  $x$ . Minimizing these certificates over all  $i \in \{2, 3, \dots, c\}$  yields a robustness certificate for the sensitive class.

Note that  $g$  mapping to 2 or more logits, all convex in the input, would not yield any tractable certificates. This is because the classifier decision function would now be the difference of two convex functions and have neither convex nor concave structure. We therefore choose to instantiate our binary classification networks with a single convex output logit for clarity.

### A.1 Maling Multiclass Extension

As a proof-of-concept, we provide a concrete realization of the first scheme above on the Maling dataset. Namely, consider the setting where we want to distinguish between “clean” binaries and 24 classes of malware. A malware designer seeks to maliciously perturb the bytes in their binary to fool a classifier into falsely predicting that the malware is “clean.” We therefore consider a cascading architecture where first a feature-convex classifier answers the “clean or malware” question, and then a subsequent classifier (not necessarily feature-convex) predicts the particular class of malware in the case that the feature-convex classifier assigns a “malware” prediction. Note that, in the initial step, we can either certify the “clean” binaries or the collection of all 24 malware classes, simply by negating the feature-convex classifier output logit. We logically choose to certify the malware classes as done in our experiments of Section 4; these certificates provide guarantees against a piece of malware going undetected.

We use the same feature-convex architecture and training details as described in Appendix E. For the cascaded malware classifier, we use a ResNet-18 architecture trained with Adam for 150 epochs with a learning rate of  $10^{-3}$ . The confusion plot for the multiclass classifier is provided in Figure 3, with an overall accuracy of 96.5%. With the exception of few challenging classes to distinguish, the classifier achieves reasonable performance despite the unbalanced class sizes.

Figure 4 visualizes the distribution of certified radii for the four most common malware classes in the dataset, excluding the “Yuner.A” class which featured duplicated images. Note that certification performance varies between classes, with high correlation across different norms for a particular malware class. Classes which tend to have larger certificates can be interpreted as clustering further away from the clean binaries, requiring larger perturbations to fool the classifier.

## B Feature Map Motivation

This section examines the importance of the feature map  $\varphi$  with a low-dimensional example. Consider the binary classification setting where one class  $X_2 \subseteq \mathbb{R}^d$  is clustered around the origin and the other class  $X_1 \subseteq \mathbb{R}^d$  surrounds it in a ring. Here, the pair  $(X_1, X_2)$  is convexly separable (see Definition 3.3) as an  $\ell_2$ -norm ball decision region covering  $X_2$  is convex (Figure 5a). Note that the reverse pair  $(X_2, X_1)$  is *not* convexly separable, as there does not exist a convex set containing  $X_1$  but excluding  $X_2$ . A standard input-convex classifier with  $\varphi = \text{Id}$  would therefore be unable to

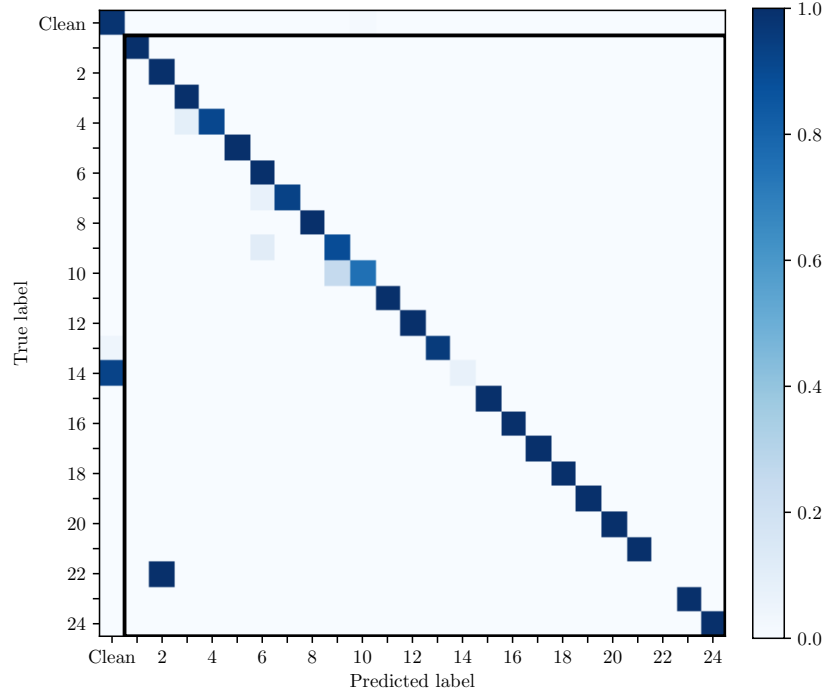

Figure 3: The row-normalized confusion plot for the Maling multiclass classifier. The overall accuracy of the composite classifier is 96.5%. The various malware classes (1-24) are circumscribed with a black rectangle. These are certified against the class of “clean” binaries. See Section 4 for more details on the mock clean binaries.

640 discriminate between the classes in this direction (Proposition 3.5), i.e., we would be able to learn a  
 641 classifier that generates certificates for points in  $X_1$ , but not  $X_2$ .

642 The above problem is addressed by choosing the feature map to be the simple concatenation  
 643  $\varphi(x) = (x, |x|)$  mapping from  $\mathbb{R}^d$  to  $\mathbb{R}^q = \mathbb{R}^{2d}$ , with associated Lipschitz constants  $\text{Lip}_1(\varphi) \leq 2$ ,  
 644  $\text{Lip}_2(\varphi) \leq \sqrt{2}$ , and  $\text{Lip}_\infty(\varphi) \leq 1$ . In this augmented feature space,  $X_1$  and  $X_2$  are convexly  
 645 separable in both directions, as they are each contained in a convex set (specifically, a half-space)  
 646 whose complement contains the other class. We are now able to learn a classifier that takes  $X_2$  as the  
 647 sensitive class for which certificates are required (Figure 5b). This parallels the motivation of the  
 648 support vector machine “kernel trick,” where inputs are augmented to a higher-dimensional space  
 649 wherein the data is linearly separable (instead of convexly separable as in our case).

### 650 C Proofs for Section 3 (Certification and Analysis of Feature-Convex 651 Classifiers)

652 **Theorem 3.1.** *Let  $f \in \mathcal{F}$  be as in Definition 2.1 and let  $x \in f^{-1}(\{1\}) = \{x' \in \mathbb{R}^d : f(x') = 1\}$ . If*  
 653  *$\nabla g(\varphi(x)) \in \mathbb{R}^q$  is a nonzero subgradient of the convex function  $g$  at  $\varphi(x)$ , then  $f(x + \delta) = 1$  for all*  
 654  *$\delta \in \mathbb{R}^d$  such that*

$$\|\delta\|_p < r(x) := \frac{g(\varphi(x))}{\text{Lip}_p(\varphi) \|\nabla g(\varphi(x))\|_{p,*}}.$$



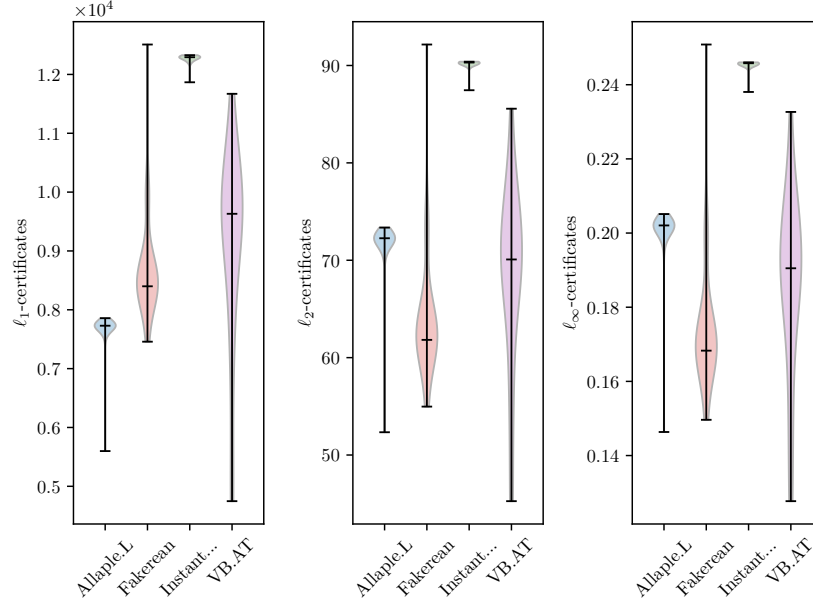

Figure 4: Certified radii distributions for four malware classes in the Maling dataset.

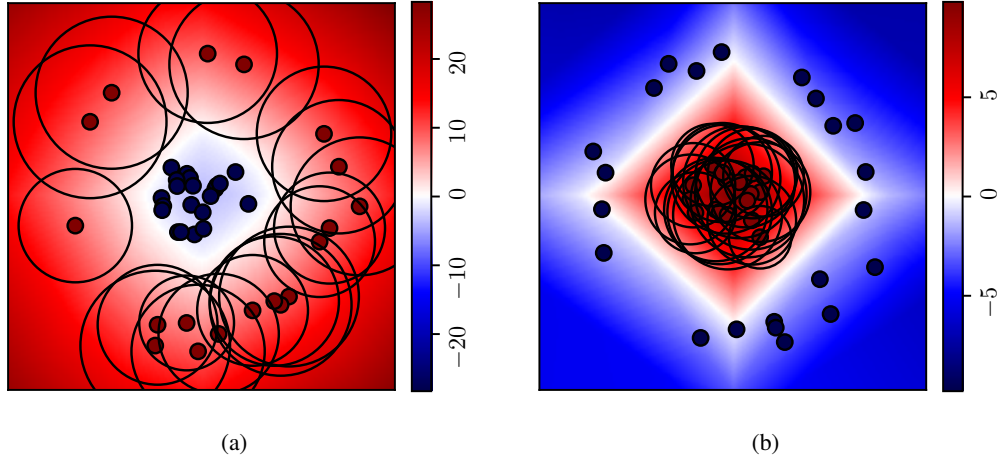

Figure 5: Experiments demonstrating the role of the feature map  $\varphi = (x, |x|)$  in  $\mathbb{R}^2$ , with the output logit shaded. Certified radii from our method are shown as black rings. (a) Certifying the outer class (dark red points). This is possible using an input-convex classifier as a convex sublevel set contains the inner class (dark blue points). (b) Certifying the inner class (dark red points). This would not be possible with  $\varphi = \text{Id}$  as there is no convex set containing the outer class (dark blue points) but excluding the inner. The feature map  $\varphi$  enables this by permitting convex separability in the higher dimensional space. Note that although the shaded output logit is not convex in the input, we still generate certificates.

655 *Proof.* Suppose that  $\nabla g(\varphi(x)) \in \mathbb{R}^q$  is a nonzero subgradient of  $g$  at  $\varphi(x)$ , so that  $g(y) \geq g(\varphi(x)) +$   
656  $\nabla g(\varphi(x))^\top (y - \varphi(x))$  for all  $y \in \mathbb{R}^q$ . Let  $\delta \in \mathbb{R}^d$  be such that  $\|\delta\|_p < r(x)$ . Then it holds that

$$\begin{aligned}
g(\varphi(x + \delta)) &\geq g(\varphi(x)) + \nabla g(\varphi(x))^\top (\varphi(x + \delta) - \varphi(x)) \\
&\geq g(\varphi(x)) - \|\nabla g(\varphi(x))\|_{p,*} \|\varphi(x + \delta) - \varphi(x)\|_p \\
&\geq g(\varphi(x)) - \|\nabla g(\varphi(x))\|_{p,*} \text{Lip}_p(\varphi) \|\delta\|_p \\
&> 0,
\end{aligned}$$

so indeed  $f(x + \delta) = 1$ .  $\square$

**Lemma C.1.** *For any nonempty closed convex set  $X \subseteq \mathbb{R}^d$ , there exists a convex function  $g: \mathbb{R}^d \rightarrow \mathbb{R}$  such that  $X = g^{-1}((-\infty, 0]) = \{x \in \mathbb{R}^d : g(x) \leq 0\}$ .*

*Proof.* Let  $X \subseteq \mathbb{R}^d$  be a nonempty closed convex set. We take the distance function  $g = d_X$  defined by  $d_X(x) = \inf_{y \in X} \|y - x\|_2$ . Since  $X$  is closed and  $y \mapsto \|y - x\|_2$  is coercive for all  $x \in \mathbb{R}^d$ , it holds that  $y \mapsto \|y - x\|_2$  attains its infimum over  $X$  [10, Proposition A.8]. Let  $x^{(1)}, x^{(2)} \in \mathbb{R}^d$  and let  $\theta \in [0, 1]$ . Then there exist  $y^{(1)}, y^{(2)} \in X$  such that  $g(x^{(1)}) = \|y^{(1)} - x^{(1)}\|_2$  and  $g(x^{(2)}) = \|y^{(2)} - x^{(2)}\|_2$ . Since  $X$  is convex, it holds that  $\theta y^{(1)} + (1 - \theta)y^{(2)} \in X$ , and therefore

$$\begin{aligned} g(\theta x^{(1)} + (1 - \theta)x^{(2)}) &= \inf_{y \in X} \|y - (\theta x^{(1)} + (1 - \theta)x^{(2)})\|_2 \\ &\leq \|\theta y^{(1)} + (1 - \theta)y^{(2)} - (\theta x^{(1)} + (1 - \theta)x^{(2)})\|_2 \\ &\leq \theta \|y^{(1)} - x^{(1)}\|_2 + (1 - \theta) \|y^{(2)} - x^{(2)}\|_2 \\ &= \theta g(x^{(1)}) + (1 - \theta)g(x^{(2)}). \end{aligned}$$

Hence,  $g = d_X$  is convex. Since  $X = \{x \in \mathbb{R}^d : \inf_{y \in X} \|y - x\|_2 = 0\} = \{x \in \mathbb{R}^d : d_X(x) = 0\} = \{x \in \mathbb{R}^d : d_X(x) \leq 0\} = \{x \in \mathbb{R}^d : g(x) \leq 0\}$  by nonnegativity of  $d_X$ , the lemma holds.  $\square$

**Proposition 3.4.** *For any nonempty closed convex set  $X \subseteq \mathbb{R}^d$ , there exists  $f \in \mathcal{F}_{\text{Id}}$  such that  $X = f^{-1}(\{2\}) = \{x \in \mathbb{R}^d : f(x) = 2\}$ . In particular, this shows that if  $(X_1, X_2)$  is a convexly separable pair of subsets of  $\mathbb{R}^d$ , then there exists  $f \in \mathcal{F}_{\text{Id}}$  such that  $f(x) = 1$  for all  $x \in X_1$  and  $f(x) = 2$  for all  $x \in X_2$ .*

*Proof.* Let  $X \subseteq \mathbb{R}^d$  be a nonempty closed convex set. By Lemma C.1, there exists a convex function  $g: \mathbb{R}^d \rightarrow \mathbb{R}$  such that  $X = \{x \in \mathbb{R}^d : g(x) \leq 0\}$ . Define  $f: \mathbb{R}^d \rightarrow \{1, 2\}$  by  $f(x) = 1$  if  $g(x) > 0$  and  $f(x) = 2$  if  $g(x) \leq 0$ . Clearly, it holds that  $f \in \mathcal{F}_{\text{Id}}$ . Furthermore, for all  $x \in X$  it holds that  $g(x) \leq 0$ , implying that  $f(x) = 2$  for all  $x \in X$ . Conversely, if  $x \in \mathbb{R}^d$  is such that  $f(x) = 2$ , then  $g(x) \leq 0$ , implying that  $x \in X$ . Hence,  $X = \{x \in \mathbb{R}^d : f(x) = 2\}$ .

If  $(X_1, X_2)$  is a convexly separable pair of subsets of  $\mathbb{R}^d$ , then there exists a nonempty closed convex set  $X \subseteq \mathbb{R}^d$  such that  $X_2 \subseteq X$  and  $X_1 \subseteq \mathbb{R}^d \setminus X$ , and therefore there exists  $f \in \mathcal{F}_{\text{Id}}$  such that  $X_2 \subseteq X = f^{-1}(\{2\})$  and  $X_1 \subseteq \mathbb{R}^d \setminus X = f^{-1}(\{1\})$ , implying that indeed  $f(x) = 1$  for all  $x \in X_1$  and  $f(x) = 2$  for all  $x \in X_2$ .  $\square$

**Proposition 3.5.** *Let  $f \in \mathcal{F}_{\text{Id}}$ . The decision region under  $f$  associated to class 2, namely  $X := f^{-1}(\{2\}) = \{x \in \mathbb{R}^d : f(x) = 2\}$ , is a closed convex set.*

*Proof.* For all  $x \in \mathbb{R}^d$ , it holds that  $f(x) = 2$  if and only if  $g(x) \leq 0$ . Since  $f \in \mathcal{F}_{\text{Id}}$ ,  $g$  is convex, and hence,  $X = \{x \in \mathbb{R}^d : g(x) \leq 0\}$  is a (nonstrict) sublevel set of a convex function and is therefore a closed convex set.  $\square$

In order to apply the universal approximation results in Chen et al. [16], we now introduce their parameterization of input-convex ReLU neural networks. Note that it imposes the additional constraint that the first weight matrix  $A^{(1)}$  is elementwise nonnegative.

**Definition C.2.** Define  $\tilde{\mathcal{F}}_{\text{Id}}$  to be the class of functions  $\tilde{f}: \mathbb{R}^d \rightarrow \{1, 2\}$  given by  $\tilde{f}(x) = T(\tilde{g}(x))$  with  $\tilde{g}: \mathbb{R}^d \rightarrow \mathbb{R}$  given by

$$\begin{aligned} x^{(1)} &= \text{ReLU} \left( A^{(1)}x + b^{(1)} \right), \\ x^{(l)} &= \text{ReLU} \left( A^{(l)}x^{(l-1)} + b^{(l)} + C^{(l)}x \right), \quad l \in \{2, 3, \dots, L-1\}, \\ \tilde{g}(x) &= A^{(L)}x^{(L-1)} + b^{(L)} + C^{(L)}x, \end{aligned}$$

for some  $L \in \mathbb{N}$ ,  $L > 1$ , and some consistently sized matrices  $A^{(1)}, C^{(1)}, \dots, A^{(L)}, C^{(L)}$ , all of which have nonnegative elements, and some consistently sized vectors  $b^{(1)}, \dots, b^{(L)}$ .

692 The following preliminary lemma relates the class  $\hat{\mathcal{F}}_{\text{Id}}$  from Definition 2.2 to the class  $\tilde{\mathcal{F}}_{\text{Id}}$  above.

693 **Lemma C.3.** *It holds that  $\tilde{\mathcal{F}}_{\text{Id}} \subseteq \hat{\mathcal{F}}_{\text{Id}}$ .*

694 *Proof.* Let  $\tilde{f} \in \tilde{\mathcal{F}}_{\text{Id}}$ . Then certainly  $A^{(l)} \geq 0$  for all  $l \in \{2, 3, \dots, L\}$ , so indeed  $\tilde{f} \in \hat{\mathcal{F}}_{\text{Id}}$ . Hence,  
695  $\tilde{\mathcal{F}}_{\text{Id}} \subseteq \hat{\mathcal{F}}_{\text{Id}}$ .  $\square$

696 Theorem 1 in Chen et al. [16] shows that a Lipschitz convex function can be approximated within an  
697 arbitrary tolerance. We now provide a technical lemma adapting Theorem 1 in Chen et al. [16] to  
698 show that convex functions can be *underapproximated* within an arbitrary tolerance on a compact  
699 convex subset.

700 **Lemma C.4.** *For any convex function  $g: \mathbb{R}^d \rightarrow \mathbb{R}$ , any compact convex subset  $X$  of  $\mathbb{R}^d$ , and any  
701  $\epsilon > 0$ , there exists  $\hat{f} \in \hat{\mathcal{F}}_{\text{Id}}$  such that  $\hat{g}(x) < g(x)$  for all  $x \in X$  and  $\sup_{x \in X} (g(x) - \hat{g}(x)) < \epsilon$ .*

702 *Proof.* Let  $g: \mathbb{R}^d \rightarrow \mathbb{R}$  be a convex function, let  $X$  be a compact convex subset of  $\mathbb{R}^d$ , and let  
703  $\epsilon > 0$ . Since  $g - \epsilon/2$  is a real-valued convex function on  $\mathbb{R}^d$  (and hence is proper), its restriction to  
704 the closed and bounded set  $X$  is Lipschitz continuous [56, Theorem 10.4], and therefore Lemma  
705 C.3 together with Theorem 1 in Chen et al. [16] gives that there exists  $\hat{f} \in \tilde{\mathcal{F}}_{\text{Id}} \subseteq \hat{\mathcal{F}}_{\text{Id}}$  such that  
706  $\sup_{x \in X} |(g(x) - \epsilon/2) - \hat{g}(x)| < \epsilon/2$ . Thus, for all  $x \in X$ ,

$$\begin{aligned} g(x) - \hat{g}(x) &= \left(g(x) - \frac{\epsilon}{2}\right) - \hat{g}(x) + \frac{\epsilon}{2} \\ &> \left(g(x) - \frac{\epsilon}{2}\right) - \hat{g}(x) + \sup_{y \in X} \left|\left(g(y) - \frac{\epsilon}{2}\right) - \hat{g}(y)\right| \\ &\geq \left(g(x) - \frac{\epsilon}{2}\right) - \hat{g}(x) + \left|\left(g(x) - \frac{\epsilon}{2}\right) - \hat{g}(x)\right| \\ &\geq 0. \end{aligned}$$

707 Furthermore,

$$\begin{aligned} \sup_{x \in X} (g(x) - \hat{g}(x)) &= \sup_{x \in X} |g(x) - \hat{g}(x)| \\ &= \sup_{x \in X} \left|\left(g(x) - \frac{\epsilon}{2}\right) - \hat{g}(x) + \frac{\epsilon}{2}\right| \\ &\leq \sup_{x \in X} \left|\left(g(x) - \frac{\epsilon}{2}\right) - \hat{g}(x)\right| + \frac{\epsilon}{2} \\ &< \epsilon, \end{aligned}$$

708 which proves the lemma.  $\square$

709 We leverage Lemma C.4 to construct a uniformly converging sequence of underapproximating  
710 functions.

711 **Lemma C.5.** *For all  $f \in \mathcal{F}_{\text{Id}}$  and all compact convex subsets  $X$  of  $\mathbb{R}^d$ , there exists a sequence  
712  $\{\hat{f}_n \in \hat{\mathcal{F}}_{\text{Id}} : n \in \mathbb{N}\} \subseteq \hat{\mathcal{F}}_{\text{Id}}$  such that  $\hat{g}_n(x) < \hat{g}_{n+1}(x) < g(x)$  for all  $x \in X$  and all  $n \in \mathbb{N}$  and  $\hat{g}_n$   
713 converges uniformly to  $g$  on  $X$  as  $n \rightarrow \infty$ .*

714 *Proof.* Let  $f \in \mathcal{F}_{\text{Id}}$  and let  $X$  be a compact convex subset of  $\mathbb{R}^d$ . Let  $\{\epsilon_n > 0 : n \in \mathbb{N}\}$  be a  
715 sequence such that  $\epsilon_{n+1} < \epsilon_n$  for all  $n \in \mathbb{N}$  and  $\epsilon_n \rightarrow 0$  as  $n \rightarrow \infty$ . Such a sequence clearly  
716 exists, e.g., by taking  $\epsilon_n = 1/n$  for all  $n \in \mathbb{N}$ . Now, for all  $n \in \mathbb{N}$ , the function  $g - \epsilon_{n+1}$  is convex,  
717 and therefore by Lemma C.4 there exists  $\hat{f}_n \in \hat{\mathcal{F}}_{\text{Id}}$  such that  $\hat{g}_n(x) < g(x) - \epsilon_{n+1}$  for all  $x \in X$   
718 and  $\sup_{x \in X} ((g(x) - \epsilon_{n+1}) - \hat{g}_n(x)) < \epsilon_n - \epsilon_{n+1}$ . Fixing such  $\hat{f}_n, \hat{g}_n$  for all  $n \in \mathbb{N}$ , we see that  
719  $\sup_{x \in X} ((g(x) - \epsilon_{n+2}) - \hat{g}_{n+1}(x)) < \epsilon_{n+1} - \epsilon_{n+2}$ , which implies that

$$\hat{g}_{n+1}(x) > g(x) - \epsilon_{n+1} > \hat{g}_n(x)$$

720 for all  $x \in X$ , which proves the first inequality. The second inequality comes from the fact that  
721  $\hat{g}_{n+1}(x) < g(x) - \epsilon_{n+2} < g(x)$  for all  $x \in X$ . Finally, since  $g(x) - \hat{g}_n(x) > \epsilon_{n+1} > 0$  for all  
722  $x \in X$  and all  $n \in \mathbb{N}$ , we see that

$$\sup_{x \in X} |g(x) - \hat{g}_n(x)| = \sup_{x \in X} (g(x) - \hat{g}_n(x)) < \epsilon_n \rightarrow 0 \text{ as } n \rightarrow \infty,$$

723 which proves that  $\lim_{n \rightarrow \infty} \sup_{x \in X} |g(x) - \hat{g}_n(x)| = 0$ , so indeed  $\hat{g}_n$  converges uniformly to  $g$  on  
 724  $X$  as  $n \rightarrow \infty$ .  $\square$

725 With all the necessary lemmas in place, we now present our main theoretical results.

726 **Theorem 3.6.** *For any  $f \in \mathcal{F}_{\text{Id}}$ , any compact convex subset  $X$  of  $\mathbb{R}^d$ , and any  $\epsilon > 0$ , there exists*  
 727  *$\hat{f} \in \hat{\mathcal{F}}_{\text{Id}}$  such that  $m(\{x \in X : \hat{f}(x) \neq f(x)\}) < \epsilon$ .*

728 *Proof.* Let  $f \in \mathcal{F}_{\text{Id}}$  and let  $X$  be a compact convex subset of  $\mathbb{R}^d$ . By Lemma C.5, there exists a  
 729 sequence  $\{\hat{f}_n \in \hat{\mathcal{F}}_{\text{Id}} : n \in \mathbb{N}\} \subseteq \hat{\mathcal{F}}_{\text{Id}}$  such that  $\hat{g}_n(x) < \hat{g}_{n+1}(x) < g(x)$  for all  $x \in X$  and all  
 730  $n \in \mathbb{N}$  and  $\hat{g}_n$  converges uniformly to  $g$  on  $X$  as  $n \rightarrow \infty$ . Fix this sequence.

731 For all  $n \in \mathbb{N}$ , define

$$E_n = \{x \in X : \hat{f}_n(x) \neq f(x)\},$$

732 i.e., the set of points in  $X$  for which the classification under  $\hat{f}_n$  does not agree with that under  $f$ .  
 733 Since  $\hat{g}_n(x) < g(x)$  for all  $x \in X$  and all  $n \in \mathbb{N}$ , we see that

$$\begin{aligned} E_n &= \{x \in X : \hat{g}_n(x) > 0 \text{ and } g(x) \leq 0\} \cup \{x \in X : \hat{g}_n(x) \leq 0 \text{ and } g(x) > 0\} \\ &= \{x \in X : \hat{g}_n(x) \leq 0 \text{ and } g(x) > 0\}. \end{aligned}$$

734 Since  $g$  is a real-valued convex function on  $\mathbb{R}^d$ , it is continuous [56, Corollary 10.1.1], and therefore  
 735  $g^{-1}((0, \infty)) = \{x \in \mathbb{R}^d : g(x) > 0\}$  is measurable. Similarly,  $\hat{g}_n^{-1}((-\infty, 0]) = \{x \in \mathbb{R}^d : \hat{g}_n(x) \leq 0\}$   
 736 is also measurable for all  $n \in \mathbb{N}$  since  $\hat{g}_n$  is continuous. Furthermore,  $X$  is measurable  
 737 as it is compact. Therefore,  $E_n$  is measurable for all  $n \in \mathbb{N}$ . Now, since  $\hat{g}_n(x) < \hat{g}_{n+1}(x)$  for all  
 738  $x \in X$  and all  $n \in \mathbb{N}$ , it holds that  $E_{n+1} \subseteq E_n$  for all  $n \in \mathbb{N}$ . It is clear that to prove the result, it  
 739 suffices to show that  $\lim_{n \rightarrow \infty} m(E_n) = 0$ . Therefore, if we show that  $m(\bigcap_{n \in \mathbb{N}} E_n) = 0$ , then the  
 740 fact that  $m(E_1) \leq m(X) < \infty$  together with Lebesgue measure's continuity from above yields that  
 741  $\lim_{n \rightarrow \infty} m(E_n) = 0$ , thereby proving the result.

742 It remains to be shown that  $m(\bigcap_{n \in \mathbb{N}} E_n) = 0$ . To this end, suppose for the sake of contradiction  
 743 that  $\bigcap_{n \in \mathbb{N}} E_n \neq \emptyset$ . Then there exists  $x \in \bigcap_{n \in \mathbb{N}} E_n$ , meaning that  $g(x) > 0$  and  $\hat{g}_n(x) \leq 0$  for  
 744 all  $n \in \mathbb{N}$ . Thus, for this  $x \in X$ , we find that  $\limsup_{n \rightarrow \infty} \hat{g}_n(x) \leq 0 < g(x)$ , which contradicts  
 745 the fact that  $\hat{g}_n$  uniformly converges to  $g$  on  $X$ . Therefore, it must be that  $\bigcap_{n \in \mathbb{N}} E_n = \emptyset$ , and thus  
 746  $m(\bigcap_{n \in \mathbb{N}} E_n) = 0$ , which concludes the proof.  $\square$

747 **Theorem 3.7.** *If  $(X_1, X_2)$  is a convexly separable pair of finite subsets of  $\mathbb{R}^d$ , then there exists*  
 748  *$\hat{f} \in \hat{\mathcal{F}}_{\text{Id}}$  such that  $\hat{f}(x) = 1$  for all  $x \in X_1$  and  $\hat{f}(x) = 2$  for all  $x \in X_2$ .*

749 *Proof.* Throughout this proof, we denote the complement of a set  $Y \subseteq \mathbb{R}^d$  by  $Y^c = \mathbb{R}^d \setminus Y$ .

750 Suppose that  $X_1 = \{x^{(1)}, \dots, x^{(M)}\} \subseteq \mathbb{R}^d$  and  $X_2 = \{y^{(1)}, \dots, y^{(N)}\} \subseteq \mathbb{R}^d$  are such that  
 751  $(X_1, X_2)$  is convexly separable. Then, by definition of convex separability, there exists a nonempty  
 752 closed convex set  $X' \subseteq \mathbb{R}^d$  such that  $X_2 \subseteq X'$  and  $X_1 \subseteq \mathbb{R}^d \setminus X'$ . Let  $X = X' \cap \text{conv}(X_2)$ .  
 753 Since  $X_2 \subseteq X'$  and both sets  $X'$  and  $\text{conv}(X_2)$  are convex, the set  $X$  is nonempty and convex.  
 754 By finiteness of  $X_2$ , the set  $\text{conv}(X_2)$  is compact, and therefore by closedness of  $X'$ , the set  $X$  is  
 755 compact and hence closed.

756 By Proposition 3.4, there exists  $f \in \mathcal{F}_{\text{Id}}$  such that  $f^{-1}(\{2\}) = X$ . Since  $\text{conv}(X_1 \cup X_2)$  is compact  
 757 and convex, Lemma C.5 gives that there exists a sequence  $\{\hat{f}_n \in \hat{\mathcal{F}}_{\text{Id}} : n \in \mathbb{N}\} \subseteq \hat{\mathcal{F}}_{\text{Id}}$  such that  
 758  $\hat{g}_n(x) < \hat{g}_{n+1}(x) < g(x)$  for all  $x \in \text{conv}(X_1 \cup X_2)$  and all  $n \in \mathbb{N}$  and  $\hat{g}_n$  converges uniformly to  
 759  $g$  on  $\text{conv}(X_1 \cup X_2)$  as  $n \rightarrow \infty$ . Fix this sequence.

760 Let  $x \in X_2$ . Then, since  $X_2 \subseteq X'$  and  $X_2 \subseteq \text{conv}(X_2)$ , it holds that  $x \in X' \cap \text{conv}(X_2) =$   
 761  $X = f^{-1}(\{2\})$ , implying that  $f(x) = 2$  and hence  $g(x) \leq 0$ . Since  $\hat{g}_n(x) < g(x)$  for all  $n \in \mathbb{N}$ ,  
 762 this shows that  $\hat{f}_n(x) = 2$  for all  $n \in \mathbb{N}$ . On the other hand, let  $i \in \{1, \dots, M\}$  and consider  
 763  $x = x^{(i)} \in X_1$ . Since  $X_1 \subseteq \mathbb{R}^d \setminus X' = \mathbb{R}^d \cap (X')^c \subseteq \mathbb{R}^d \cap (X' \cap \text{conv}(X_2))^c = \mathbb{R}^d \cap X^c =$   
 764  $\mathbb{R}^d \cap f^{-1}(\{1\})$ , it holds that  $f(x) = 1$  and thus  $g(x) > 0$ . Suppose for the sake of contradiction  
 765 that  $\hat{f}_n(x) = 2$  for all  $n \in \mathbb{N}$ . Then  $\hat{g}_n(x) \leq 0$  for all  $n \in \mathbb{N}$ . Therefore, for this  $x \in X_1$ , we find  
 766 that  $\limsup_{n \rightarrow \infty} \hat{g}_n(x) \leq 0 < g(x)$ , which contradicts the fact that  $\hat{g}_n$  uniformly converges to  $g$

767 on  $\text{conv}(X_1 \cup X_2)$ . Therefore, it must be that there exists  $n_i \in \mathbb{N}$  such that  $\hat{f}_{n_i}(x) = 1$ , and thus  
 768  $\hat{g}_{n_i}(x) > 0$ . Since  $\hat{g}_n(x) < \hat{g}_{n+1}(x)$  for all  $n \in \mathbb{N}$ , this implies that  $\hat{g}_n(x) > 0$  for all  $n \geq n_i$ .  
 769 Hence,  $\hat{f}_n(x) = \hat{f}_n(x^{(i)}) = 1$  for all  $n \geq n_i$ .

770 Let  $n^*$  be the maximum of all such  $n_i$ , i.e.,  $n^* = \max\{n_i : i \in \{1, \dots, M\}\}$ . Then the above  
 771 analysis shows that  $\hat{f}_{n^*}(x) = 2$  for all  $x \in X_2$  and that  $\hat{f}_{n^*}(x) = 1$  for all  $x \in X_1$ . Since  $\hat{f}_{n^*} \in \hat{\mathcal{F}}_{\text{Id}}$ ,  
 772 the claim has been proven.  $\square$

773 **Theorem 3.9.** Consider  $M, N \in \mathbb{N}$ . Let  $X_1 = \{x^{(1)}, \dots, x^{(M)}\} \subseteq \mathbb{R}^d$  and  $X_2 =$   
 774  $\{y^{(1)}, \dots, y^{(N)}\} \subseteq \mathbb{R}^d$  be samples with all elements  $x_k^{(i)}, y_l^{(j)}$  drawn independently and identi-  
 775 cally from the uniform probability distribution on  $[-1, 1]$ . Then, it holds that

$$\mathbb{P}((X_1, X_2) \text{ is convexly separable}) \geq \begin{cases} 1 - \left(1 - \frac{M!N!}{(M+N)!}\right)^d & \text{for all } d \in \mathbb{N}, \\ 1 & \text{if } d \geq M + N. \end{cases} \quad (2)$$

776 In particular,  $\hat{\mathcal{F}}_{\text{Id}}$  contains an input-convex ReLU neural network that classifies all  $x^{(i)}$  into class  
 777 1 and all  $y^{(j)}$  into class 2 almost surely for sufficiently large dimensions  $d$ .

778 *Proof.* Throughout the proof, we denote the cardinality of a set  $S$  by  $|S|$ . For the reader's convenience,  
 779 we also recall that, for  $n \in \mathbb{N}$ , the symmetric group  $S_n$  consists of all permutations (i.e., bijections)  
 780 on the set  $\{1, 2, \dots, n\}$ , and that  $|S_n| = n!$ . If  $\sigma: \{1, 2, \dots, n\} \rightarrow \{1, 2, \dots, n\}$  is a permutation  
 781 in  $S_n$ , we denote the restriction of  $\sigma$  to the domain  $I \subseteq \{1, 2, \dots, n\}$  by  $\sigma|_I: I \rightarrow \{1, 2, \dots, n\}$ ,  
 782 which we recall is defined by  $\sigma|_I(i) = \sigma(i)$  for all  $i \in I$ , and is not necessarily a permutation on  $I$  in  
 783 general.

784 Consider first the case where  $d \geq M + N$ . Let  $b \in \mathbb{R}^{M+N}$  be the vector defined by  $b_i = 1$  for  
 785 all  $i \in \{1, \dots, M\}$  and  $b_i = -1$  for all  $i \in \{M+1, \dots, M+N\}$ . Then, since  $x_k^{(i)}, y_l^{(j)}$  are  
 786 independent uniformly distributed random variables on  $[-1, 1]$ , it holds that the matrix

$$\begin{bmatrix} x^{(1)\top} \\ \vdots \\ x^{(M)\top} \\ y^{(1)\top} \\ \vdots \\ y^{(N)\top} \end{bmatrix} \in \mathbb{R}^{(M+N) \times d}$$

787 has rank  $M + N$  almost surely, and therefore the linear system of equations

$$\begin{bmatrix} x^{(1)\top} \\ \vdots \\ x^{(M)\top} \\ y^{(1)\top} \\ \vdots \\ y^{(N)\top} \end{bmatrix} a = b$$

788 has a solution  $a \in \mathbb{R}^d$  with probability 1, and we note that from this solution we find that  $X_2$  is  
 789 a subset of the nonempty closed convex set  $\{x \in \mathbb{R}^d : a^\top x \leq 0\}$  and that  $X_1$  is a subset of its  
 790 complement. Hence,  $(X_1, X_2)$  is convexly separable with probability 1 in this case.

791 Now let us consider the general case:  $d \in \mathbb{N}$  and in general it may be the case that  $d < M + N$ . For  
 792 notational convenience, let  $P$  be the probability of interest:

$$P = \mathbb{P}((X_1, X_2) \text{ is convexly separable}).$$

793 Suppose that there exists a coordinate  $k \in \{1, 2, \dots, d\}$  such that  $x_k^{(i)} < y_k^{(j)}$  for all pairs  $(i, j) \in$   
 794  $\{1, 2, \dots, M\} \times \{1, 2, \dots, N\}$  and that  $a := \min\{y_k^{(1)}, \dots, y_k^{(N)}\} < \max\{x_k^{(1)}, \dots, x_k^{(M)}\} =: b$ .

795 Then, let  $X = \{x \in \mathbb{R}^d : x_k \in [a, b]\}$ . That is,  $X$  is the extrusion of the convex hull of the projections  
 796  $\{y_k^{(1)}, \dots, y_k^{(N)}\}$  along all remaining coordinates. The set  $X$  is a nonempty closed convex set, and it  
 797 is clear by our supposition that  $X_2 \subseteq X$  and  $X_1 \subseteq \mathbb{R}^d \setminus X$ . Therefore, the supposition implies that  
 798  $(X_1, X_2)$  is convexly separable, and thus

$$\begin{aligned} P &\geq \mathbb{P} \left( \text{there exists } k \in \{1, 2, \dots, d\} \text{ such that } x_k^{(i)} < y_k^{(j)} \text{ for all pairs } (i, j) \right. \\ &\quad \left. \text{and that } \min\{y_k^{(1)}, \dots, y_k^{(N)}\} < \max\{y_k^{(1)}, \dots, y_k^{(N)}\} \right) \\ &= 1 - \mathbb{P} \left( \text{for all } k \in \{1, 2, \dots, d\}, \text{ it holds that } x_k^{(i)} \geq y_k^{(j)} \text{ for some pair } (i, j) \right. \\ &\quad \left. \text{or that } \min\{y_k^{(1)}, \dots, y_k^{(N)}\} = \max\{y_k^{(1)}, \dots, y_k^{(N)}\} \right) \\ &= 1 - \prod_{k=1}^d \mathbb{P} \left( x_k^{(i)} \geq y_k^{(j)} \text{ for some pair } (i, j) \text{ or } \min\{y_k^{(1)}, \dots, y_k^{(N)}\} = \max\{y_k^{(1)}, \dots, y_k^{(N)}\} \right), \end{aligned}$$

799 where the final equality follows from the independence of the coordinates of the samples. Since  
 800  $\min\{y_k^{(1)}, \dots, y_k^{(N)}\} < \max\{y_k^{(1)}, \dots, y_k^{(N)}\}$  almost surely, we find that

$$\begin{aligned} P &\geq 1 - \prod_{k=1}^d \left( \mathbb{P}(x_k^{(i)} \geq y_k^{(j)} \text{ for some pair } (i, j)) \right. \\ &\quad \left. + \mathbb{P}(\min\{y_k^{(1)}, \dots, y_k^{(N)}\} = \max\{y_k^{(1)}, \dots, y_k^{(N)}\}) \right) \\ &= 1 - \prod_{k=1}^d \mathbb{P}(x_k^{(i)} \geq y_k^{(j)} \text{ for some pair } (i, j)) \\ &= 1 - \prod_{k=1}^d \left( 1 - \mathbb{P}(x_k^{(i)} < y_k^{(j)} \text{ for all pairs } (i, j)) \right) \tag{3} \\ &= 1 - \prod_{k=1}^d \left( 1 - \mathbb{P} \left( \max_{i \in \{1, 2, \dots, M\}} x_k^{(i)} < \min_{j \in \{1, 2, \dots, N\}} y_k^{(j)} \right) \right) \\ &= 1 - \prod_{k=1}^d \left( 1 - \mathbb{P} \left( (x_k^{(1)}, \dots, x_k^{(M)}, y_k^{(1)}, \dots, y_k^{(N)}) \in \bigcup_{\sigma \in S} E_\sigma \right) \right), \end{aligned}$$

801 where we define  $S$  to be the set of permutations on  $\{1, \dots, M + N\}$  whose restriction to  $\{1, \dots, M\}$   
 802 is also a permutation;

$$S = \{\sigma \in S_{M+N} : \sigma|_{\{1, \dots, M\}} \in S_M\},$$

803 and where, for a permutation  $\sigma \in S_{M+N}$ ,  $E_\sigma$  is the event where an  $(M + N)$ -vector has indices  
 804 ordered according to  $\sigma$ ;

$$E_\sigma = \{z \in \mathbb{R}^{M+N} : z_{\sigma(1)} < \dots < z_{\sigma(M+N)}\}.$$

805 We note that the final equality in (3) relies on the fact that  $\mathbb{P}(x_k^{(i)} = x_k^{(i')}) = \mathbb{P}(y_k^{(j)} = y_k^{(j')}) = 0$  for  
 806 all  $i' \neq i$  and all  $j' \neq j$ , which is specific to our uniform distribution at hand.

807 Now, since  $E_\sigma, E_{\sigma'}$  are disjoint for distinct permutations  $\sigma, \sigma' \in S_{M+N}$ , the bound (3) gives that

$$P \geq 1 - \prod_{k=1}^d \left( 1 - \sum_{\sigma \in S} \mathbb{P}((x_k^{(1)}, \dots, x_k^{(M)}, y_k^{(1)}, \dots, y_k^{(N)}) \in E_\sigma) \right). \tag{4}$$

808 Since  $x_k^{(1)}, \dots, x_k^{(M)}, y_k^{(1)}, \dots, y_k^{(N)}$  are independent and identically distributed samples, they define  
 809 an exchangeable sequence of random variables, implying that  $\mathbb{P}((x_k^{(1)}, \dots, x_k^{(M)}, y_k^{(1)}, \dots, y_k^{(N)}) \in$   
 810  $E_\sigma) = \mathbb{P}(x_k^{(1)} < \dots < x_k^{(M)} < y_k^{(1)} < \dots < y_k^{(N)})$  for all permutations  $\sigma \in S_{M+N}$ . Since, under  
 811 the uniform distribution at hand,  $(x_k^{(1)}, \dots, x_k^{(M)}, y_k^{(1)}, \dots, y_k^{(N)}) \in E_\sigma$  for some  $\sigma \in S_{M+N}$  almost

812 surely, it holds that

$$\begin{aligned}
1 &= \mathbb{P} \left( (x_k^{(1)}, \dots, x_k^{(M)}, y_k^{(N)}, \dots, y_k^{(N)}) \in \bigcup_{\sigma \in S_{M+N}} E_\sigma \right) \\
&= \sum_{\sigma \in S_{M+N}} \mathbb{P}((x_k^{(1)}, \dots, x_k^{(M)}, y_k^{(1)}, \dots, y_k^{(N)}) \in E_\sigma) \\
&= |S_{M+N}| \mathbb{P}(x_k^{(1)} < \dots < x_k^{(M)} < y_k^{(1)} < \dots < y_k^{(N)}).
\end{aligned}$$

813 This implies that

$$\mathbb{P}((x_k^{(1)}, \dots, x_k^{(M)}, y_k^{(1)}, \dots, y_k^{(N)}) \in E_\sigma) = \frac{1}{|S_{M+N}|} = \frac{1}{(M+N)!}$$

814 for all permutations  $\sigma \in S_{M+N}$ . Hence, our bound (4) becomes

$$P \geq 1 - \prod_{k=1}^d \left( 1 - \frac{|S|}{(M+N)!} \right) = 1 - \left( 1 - \frac{|S|}{(M+N)!} \right)^d.$$

815 Finally, we immediately see that that map  $\Gamma: S_M \times S_N \rightarrow S_{M+N}$  defined by

$$\Gamma(\sigma, \sigma')(i) = \begin{cases} \sigma(i) & \text{if } i \in \{1, \dots, M\}, \\ \sigma'(i - M) + M & \text{if } i \in \{M+1, \dots, M+N\}, \end{cases}$$

816 is injective and has image  $S$ , implying that  $|S| = |S_M \times S_N| = |S_M||S_N| = M!N!$ . Thus,

$$P \geq 1 - \left( 1 - \frac{M!N!}{(M+N)!} \right)^d,$$

817 which proves (2).

818 The unit probability of  $\hat{\mathcal{F}}_{\text{Id}}$  containing a classifier that classifies all  $x^{(i)}$  into class 1 and all  $y^{(j)}$  into  
819 class 2 for large  $d$  follows immediately from Theorem 3.7.  $\square$

## 820 D CIFAR-10 Cats-versus-Dogs Convex Separability

821 In order to establish that the cat and dog images in CIFAR-10 are convexly separable, we experimen-  
822 tally attempt to reconstruct an image from one class using a convex combination of all images in the  
823 other class (without augmentation such as random crops, flips, etc.). Namely, if  $x$  is drawn from one  
824 class and  $y^{(1)}, \dots, y^{(N)}$  represent the entirety of the other class, we form the following optimization  
825 problem:

$$\begin{aligned}
&\underset{\alpha \in \mathbb{R}^N}{\text{minimize}} && \left\| x - \sum_{j=1}^N \alpha_j y^{(j)} \right\|_2 \\
&\text{subject to} && \alpha \geq 0, \\
&&& \sum_{j=1}^N \alpha_j = 1.
\end{aligned}$$

826 The reverse experiment for the other class follows similarly. We solve the optimization using  
827 MOSEK [6], and report the various norms of  $x - \sum_{j=1}^N \alpha_j y^{(j)}$  in Figure 6. Reconstruction accuracy  
828 is generally very poor, with no reconstruction achieving better than an  $\ell_1$ -error of 52. A typical  
829 reconstructed image is shown in Figure 7.

830 Yousefzadeh [74] and Balestriero et al. [9] showed a related empirical result for CIFAR-10, namely,  
831 that no test set image can be reconstructed as a convex combination of training set images. However,  
832 we remark that their findings do not necessarily imply that a training set image cannot be reconstructed  
833 via other training set images; our new finding that the CIFAR-10 cats-versus-dogs training set is  
834 convexly separable is required in order to assert Corollary 3.8.

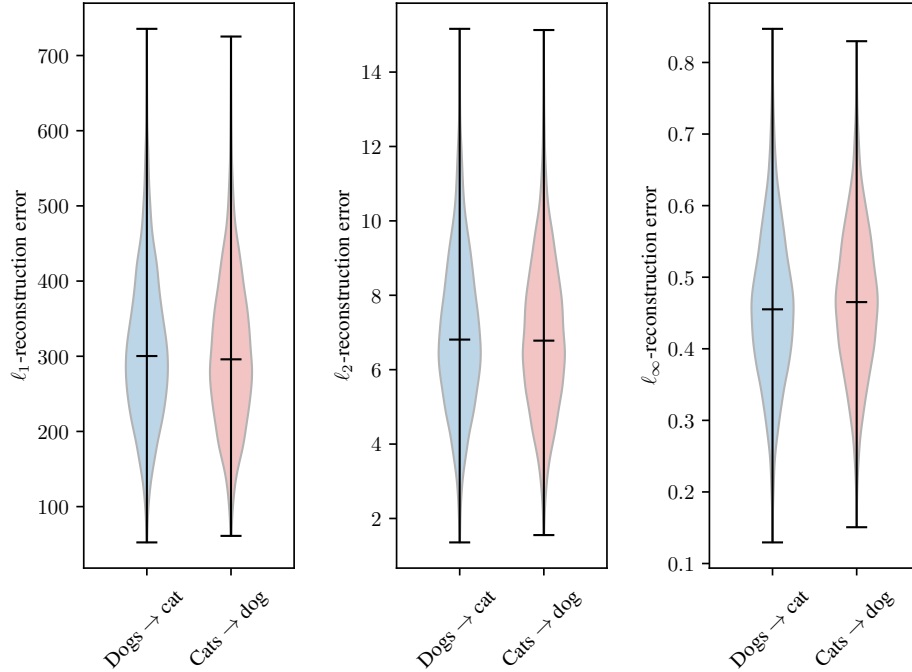

Figure 6: Reconstructing CIFAR-10 cat and dog images as convex combinations. The label “Dogs  $\rightarrow$  cat” indicates that a cat image was attempted to be reconstructed as a convex combination of all 5000 dog images.

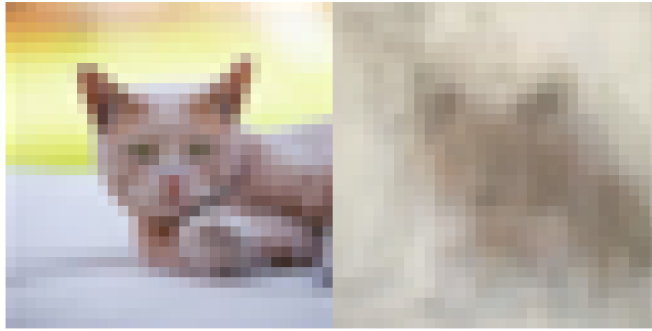

Figure 7: Reconstructing a CIFAR-10 cat image (left) from a convex combination of dog images (right). The reconstruction error norms are 294.57, 6.65, and 0.38 for the  $\ell_1$ -,  $\ell_2$ -, and  $\ell_\infty$ -norms, respectively. These are typical, as indicated by Figure 6.

## 835 E Experimental Setup

836 We include a detailed exposition of our experimental setup in this section, beginning with general  
 837 details on our choice of epochs and batch size. We then discuss baseline methods, architecture choices  
 838 for our method, class balancing, and data processing.

839 **Epochs and batch size.** Exempting the randomized smoothing baselines, for the MNIST 3-8 and  
 840 Fashion-MNIST shirts experiments, we use 60 epochs for all methods. This is increased to 150  
 841 epochs for the Maling dataset and CIFAR-10 cats-dogs experiments. The batch size is 64 for all  
 842 datasets besides the  $512 \times 512$  Maling dataset, where it is lowered to 32.



To ensure a fair comparison, the randomized smoothing baseline epochs are scaled larger than the aforementioned methods according to the noise value specified in the sweeps in Section I. The final epochs and smoothing noise values used are reported in Table 1. Note that as classifiers are typically more robust to the noise from splitting smoothing, larger values of  $\sigma$  are used for only this smoothing method in the MNIST 3-8 and Maling datasets. For Maling, we find experimentally that even noise values of up to  $\sigma = 100$  are tractable for the splitting method, outside the sweep range considered in Section I. As verification at that  $\sigma$  already takes several minutes per sample and runtime scales linearly with  $\sigma$ , we do not explore larger values of  $\sigma$ .

Table 1: Randomized smoothing final noise and epoch hyperparameters.

| Dataset              | Laplacian, Uniform, Gaussian Parameters     | Splitting Parameters                        |
|----------------------|---------------------------------------------|---------------------------------------------|
| MNIST 3-8            | $(\sigma, n) = (0.75, 60)$                  | $(\sigma, n) = (0.75 \cdot 4, 60 \cdot 4)$  |
| Maling               | $(\sigma, n) = (3.5 \cdot 4, 150 \cdot 4)$  | $(\sigma, n) = (100, 150 \cdot 4)$          |
| Fashion-MNIST shirts | $(\sigma, n) = (0.75, 60)$                  | $(\sigma, n) = (0.75, 60)$                  |
| CIFAR-10 cats-dogs   | $(\sigma, n) = (0.75 \cdot 2, 600 \cdot 2)$ | $(\sigma, n) = (0.75 \cdot 2, 600 \cdot 2)$ |

**Hardware.** All experiments were conducted on a single Ubuntu 20.04 instance with an Nvidia RTX A6000 GPU. Complete reproduction of the experiments takes approximately 0.08 GPU-years.

## E.1 Datasets

We introduce the various datasets considered in this work. MNIST 3-8 and Maling are relatively simple classification problems where near-perfect classification accuracy is attainable; the Maling dataset falls in this category despite containing relatively large images. Our more challenging settings consist of a Fashion-MNIST shirts dataset as well as CIFAR-10 cats-versus-dogs dataset.

For consistency with [77], we augment the MNIST and Fashion-MNIST training data with 1-pixel padding and random cropping. The CIFAR-10 dataset is augmented with 3-pixel edge padding, horizontal flips, and random cropping. The Maling dataset is augmented with 20-pixel padding and random  $512 \times 512$  cropping.

For CIFAR-10, MNIST, and Fashion-MNIST, we use the preselected test sets. For Maling we hold out a random 20% test dataset, although this may not be entirely used during testing. The training set is further subdivided by an 80%-20% validation split. For all experiments, we use the first 1000 test samples to evaluate our methods.

**MNIST 3-8.** For our MNIST binary classification problem, we choose the problem of distinguishing between 3 and 8 [37]. These were selected as 3 and 8 are generally more visually similar and challenging to distinguish than other digit pairs. Images are  $28 \times 28$  pixels and greyscale.

**Maling.** Our malware classification experiments use greyscale, bitwise encodings of raw malware binaries Nataraj et al. [51]. Each image pixel corresponds to one byte of data, in the range of 0–255, and successive bytes are added horizontally from left to right on the image until wrapping at some predetermined width. We use the extracted malware images from the seminal dataset Nataraj et al. [51], padding and cropping images to be  $512 \times 512$ . Note that licensing concerns generally prevent the distribution of “clean” executable binaries. As this work is focused on providing a general approach to robust classification, in the spirit of reproducibility we instead report classification results between different kinds of malware. Namely, we distinguish between malware from the most numerous “Allaple.A” class (2949 samples) and an identically-sized random subset of all other 24 malware classes. To simulate a scenario where we must provide robustness against evasive malware, we provide certificates for the latter collection of classes.

**Fashion-MNIST shirts.** The hardest classes to distinguish in the Fashion-MNIST dataset are T-shirts vs shirts, which we take as our two classes [33, 70]. Images are  $28 \times 28$  pixels and greyscale.

**CIFAR-10 cats-dogs.** We take as our two CIFAR-10 classes the cat and dog classes since they are relatively difficult to distinguish [26, 44, 30]. Other classes (e.g., ships) are typically easier to classify since large background features (e.g., blue water) are strongly correlated with the target label. Samples are  $32 \times 32$  RGB images.

## 886 E.2 Baseline Methods

887 We consider several state-of-the-art randomized and deterministic baselines. For all datasets, we  
 888 evaluate the randomized smoothing certificates of Yang et al. [72] for the Gaussian, Laplacian, and  
 889 uniform distributions trained with noise augmentation (denoted RS Gaussian, RS Laplacian, and RS  
 890 Uniform, respectively), as well as the deterministic bound propagation framework  $\alpha, \beta$ -CROWN  
 891 [66], which is scatter plotted since certification is only reported as a binary answer at a given radius.  
 892 We also evaluate, when applicable, deterministic certified methods for each norm ball. These include  
 893 the splitting-noise  $\ell_1$ -certificates from Levine and Feizi [40] (denoted Splitting), the orthogonality-  
 894 based  $\ell_2$ -certificates from Trockman and Kolter [63] (denoted Cayley), and the  $\ell_\infty$ -distance-based  
 895  $\ell_\infty$ -certificates from Zhang et al. [77] (denoted  $\ell_\infty$ -Net). The last two deterministic methods are not  
 896 evaluated on the large-scale Maling dataset due to their prohibitive runtime. Furthermore, the  $\ell_\infty$ -Net  
 897 was unable to significantly outperform a random classifier on the CIFAR-10 cats-dogs dataset, and is  
 898 therefore only included in the MNIST 3-8 and Fashion-MNIST shirts experiments.

899 We provide additional details on each of the baseline methods below.

900 **Randomized smoothing.** Since the certification runtime of randomized smoothing is large, especially  
 901 for the  $512 \times 512$  pixel Maling images, we evaluate the randomized smoothing classifiers over  $10^4$   
 902 samples and project the certified radius to  $10^5$  samples by scaling the number fed into the Clopper-  
 903 Pearson confidence interval, as described in [18]. This allows for a representative and improved  
 904 certified accuracy curve while dramatically reducing the method’s runtime. We take an initial guess  
 905 for the certification class with  $n_0 = 100$  samples and set the incorrect prediction tolerance parameter  
 906  $\alpha = 0.001$ . For CIFAR-10 we use a depth-40 Wide ResNet base classifier, mirroring the choices  
 907 from Cohen et al. [18], Yang et al. [72]; for all other datasets we use a ResNet-18. All networks are  
 908 trained using SGD with an initial learning rate of 0.1, Nesterov momentum of 0.9, weight decay of  
 909  $10^{-4}$ , and cosine annealing scheduling as described in Yang et al. [72]. Final smoothing noise values  
 910 are selected as in Table 1, and are determined from the noise level comparison sweeps in Appendix I.

911 **Splitting noise.** As this method is a deterministic derivative of randomized smoothing, it avoids the  
 912 many aforementioned hyperparameter choices. We use the same architectures described above for  
 913 the other randomized smoothing experiments.

914 **Cayley convolutions.** To maintain consistency, we use a two-hidden-layer multilayer perceptron  
 915 with  $(n_1, n_2) = (200, 50)$  hidden features, CayleyLinear layers, and GroupSort activations for the  
 916 MNIST experiment. For the more challenging Fashion-MNIST and CIFAR-10 experiments, we use  
 917 the ResNet-9 architecture implementation from [63]. Following the authors’ suggestions, we train  
 918 these networks using Adam with a learning rate of 0.001.

919  **$\ell_\infty$ -distance nets.** As the architecture of the  $\ell_\infty$ -distance net [77] is substantially different from  
 920 traditional architectures, we use the authors’ 5-layer MNIST/Fashion-MNIST architecture and 6-layer  
 921 CIFAR-10 architecture with 5120 neurons per hidden layer. Unfortunately, the classification accuracy  
 922 on the CIFAR-10 cats-dogs experiment remained near 50% throughout training. This was not the  
 923 case when we tested easier classes, such as planes-versus-cars, where large features (e.g., blue sky)  
 924 can be used to discriminate. We therefore only include this model in the MNIST and Fashion-MNIST  
 925 experiments, and use the training procedure directly from the aforementioned paper’s codebase.

926  **$\alpha, \beta$ -CROWN.** As  $\alpha, \beta$ -CROWN certification time scales exponentially with the network size, we  
 927 keep the certified networks small in order to improve the certification performance of the baseline.  
 928 For all datasets, we train and certify a one-hidden-layer network with 200 hidden units and ReLU  
 929 activations. All networks are adversarially trained for a  $\ell_\infty$ -perturbation radius starting at 0.001 and  
 930 linearly scaling to the desired  $\epsilon$  over the first 20 epochs, as described in Kaye et al. [33], which  
 931 trained the models used in Wang et al. [66]. The desired final  $\epsilon$  is set to 0.3 for MNIST, 0.1 for  
 932 Fashion-MNIST and Maling, and  $2/255$  for CIFAR-10. The adversarial training uses a standard PGD  
 933 attack with 50 steps and step size  $2\epsilon/50$ . Other optimizer training details are identical to Wang et al.  
 934 [66]. The branch-and-bound timeout is set to 30 seconds to maintain comparability to other methods,  
 935 and robustness is evaluated over a dataset-dependent range of discrete radii for each adversarial norm.

## 936 E.3 Feature-convex Architecture and Training

937 Our simple experiments (MNIST 3-8 and Maling) require no feature map to achieve high accuracy  
 938 ( $\varphi = \text{Id}$ ); the Fashion-MNIST shirts dataset also benefited minimally from the feature map inclusion.

For the CIFAR-10 cats-dogs task, we let our feature map be the concatenation  $\varphi(x) = (x - \mu, |x - \mu|)$ , where  $\mu$  is the channel-wise dataset mean (e.g., size 3 for an RGB image) broadcasted to the appropriate dimensions. Our MNIST 3-8 and Maling architecture then consists of a simple two-hidden-layer input-convex multilayer perceptron with  $(n_1, n_2) = (200, 50)$  hidden features, ReLU nonlinearities, and passthrough weights. For the more challenging datasets, we use various instantiations of a convex ConvNet (described below) where successive layers have a constant number of channels and image size. This allows for the addition of identity residual connections to each convolution and lets us remove the passthrough connections altogether. Convexity is enforced by projecting relevant weights onto the nonnegative orthant after each epoch and similarly constraining BatchNorm  $\gamma$  parameters to be positive. We initialize positive weight matrices to be drawn uniformly from the interval  $[0, \epsilon]$ , where  $\epsilon = 0.003$  for linear weights and  $\epsilon = 0.005$  for convolutional weights. Jacobian regularization is also used to improve our certified radii [31].

The convex ConvNet architecture consists of a sequence of convolutional layers, BatchNorms, and ReLU nonlinearities. The first convolutional layer is unconstrained, as the composition of a convex function with an affine function is still convex [2]. All subsequent convolutions and the final linear readout layer are uniformly initialized from some small positive weight interval ( $[0, 0.003]$  for linear weights,  $[0, 0.005]$  for convolutional weights) and projected to have nonnegative weights after each gradient step. We found this heuristic initialization choice helps to stabilize network training, as standard Kaiming initialization assumptions are violated when weights are constrained to be nonnegative instead of normally distributed with mean zero. More principled weight initialization strategies for this architecture would form an exciting area of future research. Before any further processing, inputs into the network are fed into an initial BatchNorm—this enables flexibility with different feature augmentation maps.

Since the first convolutional layer is permitted negative weights, we generally attain better performance by enlarging the first convolution kernel size (see Table 2). For subsequent convolutions, we set the stride to 1, the input and output channel counts to the output channel count from the first convolution, and the padding to half the kernel size, rounded down. This ensures that the output of each of these deeper convolutions has equivalent dimension to its input, allowing for an identity residual connection across each convolution. If  $C_i(z)$  is a convolutional operation on a hidden feature  $z$ , this corresponds to evaluating  $C_i(z) + z$  instead of just  $C_i(z)$ . The final part of the classifier applies MaxPool and BatchNorm layers before a linear readout layer with output dimension 1. See Figure 8 for a diagram depicting an exemplar convex ConvNet instantiation.

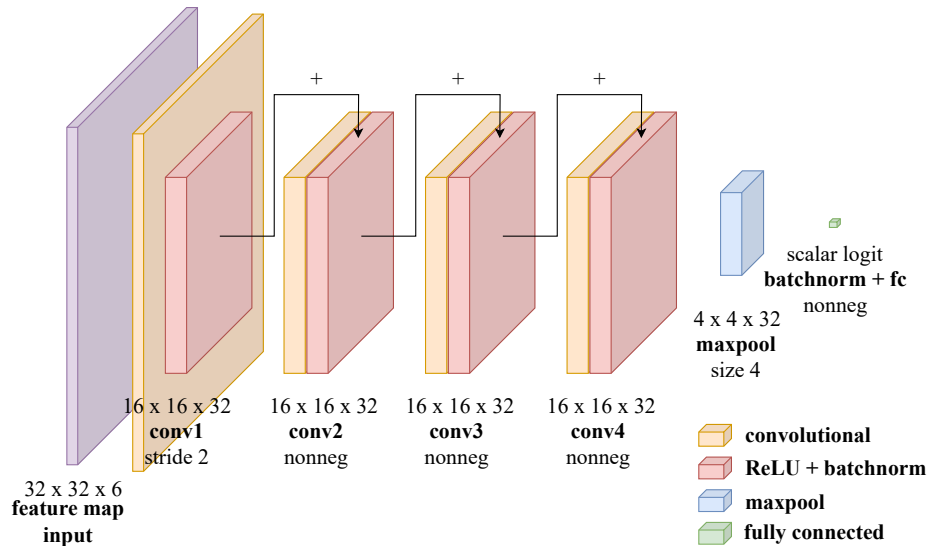

Figure 8: An example convex ConvNet of depth 4 with a  $C_1$  stride of 2, pool size of 4, and  $32 \times 32$  RGB images. There are 6 input channels from the output of the feature map  $\varphi: x \mapsto (x - \mu, |x - \mu|)$ .

For training, we use a standard binary cross entropy loss, optionally augmented with a Jacobian regularizer on the Frobenius norm of the network Jacobian scaled by  $\lambda > 0$  [31]. As our certified

radii in Theorem 3.1 vary inversely to the norm of the Jacobian, this regularization helps boost our certificates at a minimal loss in clean accuracy. We choose  $\lambda = 0.0075$  for CIFAR-10,  $\lambda = 0.075$  for Maling and  $\lambda = 0.01$  for MNIST and Fashion-MNIST. Further ablation tests studying the impact of regularization are reported in Appendix G. All feature-convex networks are trained using SGD with a learning rate of 0.001, momentum 0.9, and exponential learning rate decay with  $\gamma = 0.99$ .

Table 2: Convex ConvNet architecture parameters.  $C_1$  denotes the first convolution, with  $C_{2,\dots}$  denoting all subsequent convolutions. The “Features” column denotes the number of output features of  $C_1$ , which is held fixed across  $C_{2,\dots}$ . The “Pool” column refers to the size of the final MaxPool window before the linear readout layer. The MNIST and Maling architectures are simple multilayer perceptrons and are therefore not listed here.

| Dataset       | Features | Depth | $C_1$ size | $C_1$ stride | $C_1$ dilation | $C_{2,\dots}$ size | Pool |
|---------------|----------|-------|------------|--------------|----------------|--------------------|------|
| Fashion-MNIST | 4        | 3     | 5          | 1            | 1              | 3                  | 1    |
| CIFAR-10      | 16       | 5     | 11         | 1            | 1              | 3                  | 1    |

#### E.4 Class Accuracy Balancing

As discussed in Section 4, a balanced class 1 and class 2 test accuracy is essential for a fair comparison of different methods. For methods where the output logits can be directly balanced, this is easily accomplished by computing the ROC curve and choosing the threshold that minimizes  $|\text{TPR} - (1 - \text{FPR})|$ . This includes both our feature-convex classifiers with one output logit and the Cayley orthogonalization and  $\ell_\infty$ -Net architectures with two output logits.

Randomized smoothing classifiers are more challenging as the relationship between the base classifier threshold and the smoothed classifier prediction is indirect. We address this using a binary search balancing procedure. Namely, on each iteration, the classifier’s prediction routine is executed over the test dataset and the “error” between the class 1 accuracy and the class 2 accuracy is computed. The sign of the error then provides the binary signal for whether the threshold should be shifted higher or lower in the standard binary search implementation. This procedure is continued until the error drops below 1%.

## F $\ell_2$ - and $\ell_\infty$ -Certified Radii

This section reports the counterpart to Figure 2 for the  $\ell_2$ - and  $\ell_\infty$ -norms. Across all experiments, we attain substantial  $\ell_2$ - and  $\ell_\infty$ -radii without relying on computationally expensive sampling schemes or nondeterminism. Methods that certify to another norm  $\|\cdot\|_p$  are converted to  $\ell_q$ -radii at a factor of 1 if  $p > q$  or  $d^{1/p-1/q}$  otherwise.

Certified  $\ell_2$ -radii are reported in Figure 9. Our  $\ell_2$ -radii are moderate, generally slightly smaller than those produced by Gaussian randomized smoothing.

Certified  $\ell_\infty$ -radii are reported in Figure 10. For the MNIST 3-8 experiment, the  $\ell_\infty$ -distance nets produce exceptional certified radii. Likewise, the  $\ell_\infty$ -distance net certificates are dominant for the Fashion-MNIST dataset, despite achieving slightly inferior clean accuracy. We note however that the applicability of  $\ell_\infty$ -distance nets for sophisticated vision tasks is uncertain as the method is unable to achieve better-than-random performance for CIFAR-10 cats-dogs (Section E.2). Our method is comparable to randomized-smoothing and  $\alpha, \beta$ -CROWN in all  $\ell_\infty$  experiments.

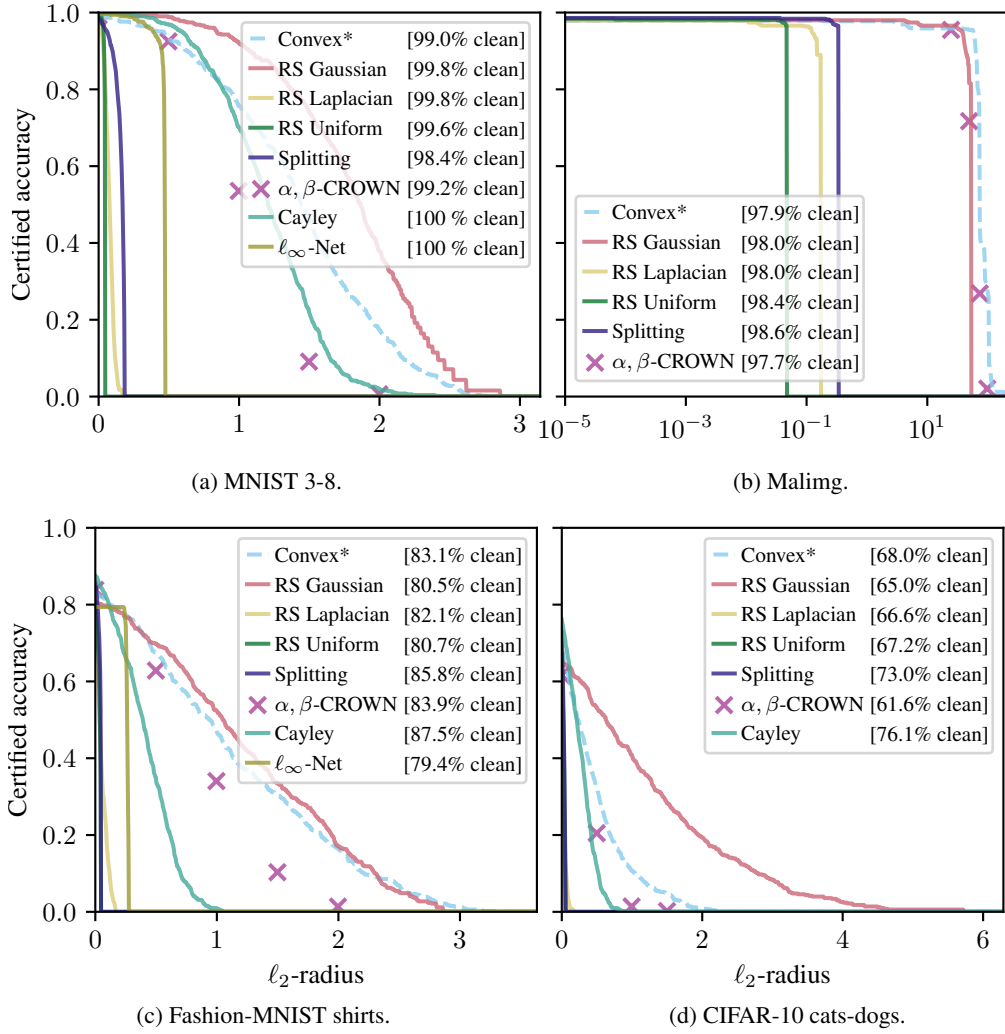

Figure 9: Class 1 certified radii curves for the  $\ell_2$ -norm.

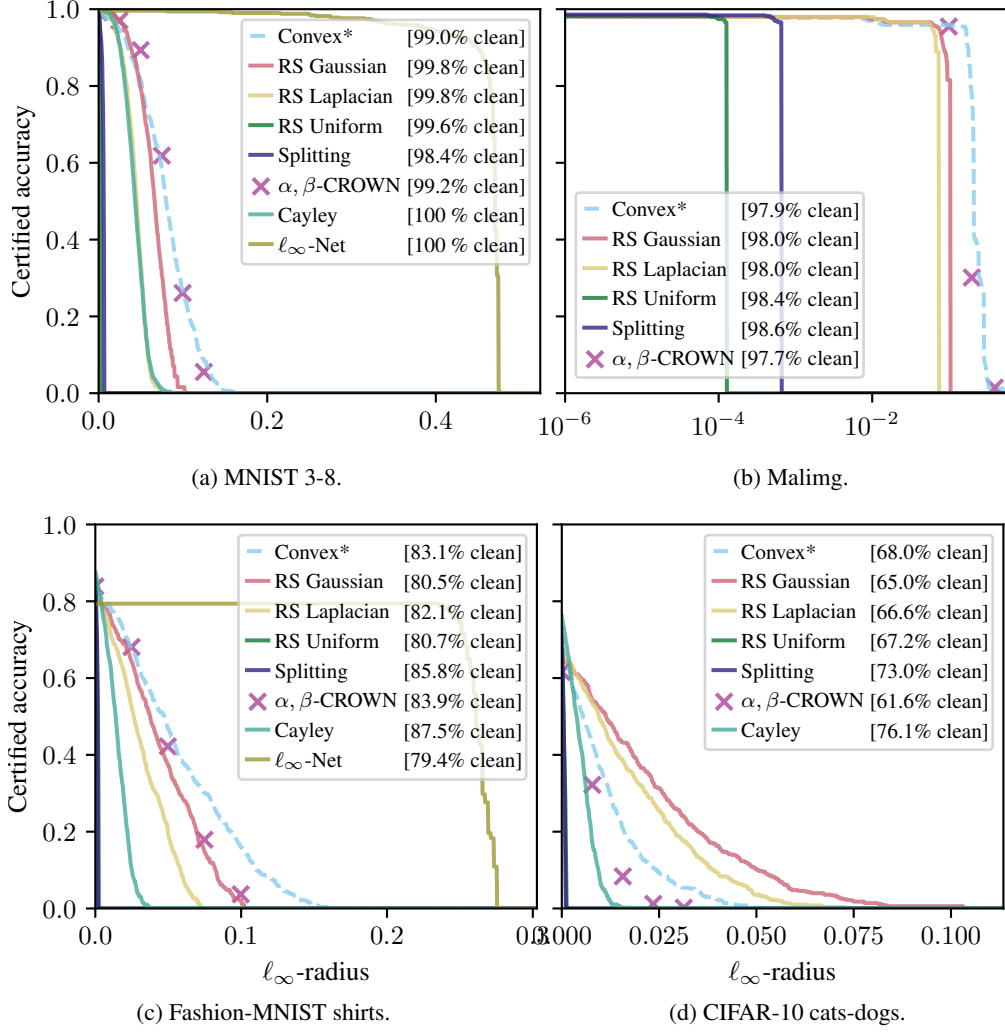

Figure 10: Class 1 certified radii curves for the  $\ell_\infty$ -norm.

## G Ablation Tests

We conduct a series of ablation tests on the CIFAR-10 cats-dogs dataset, examining the impact of regularization, feature maps, and data augmentation.

### G.1 Regularization

Figure 11 examines the impact of Jacobian regularization over a range of regularization scaling factors  $\lambda$ , with  $\lambda = 0$  corresponding to no regularization. As is typical, we see a tradeoff between clean accuracy and certified radii. Further increases in  $\lambda$  yield minimal additional benefit.

### G.2 Feature Map

In this section, we investigate the importance of the feature map  $\varphi$ . Figure 12 compares our standard feature-convex classifier with  $\varphi(x) = (x - \mu, |x - \mu|)$  against an equivalent architecture with  $\varphi = \text{Id}$ . Note that the initial layer in the convex ConvNet is a BatchNorm, so even with  $\varphi = \text{Id}$ , features still get normalized before being passed into the convolutional architecture. We perform this experiment across both the standard cats-dogs experiment (cats are certified) in the main text and the reverse dogs-cats experiment (dogs are certified).

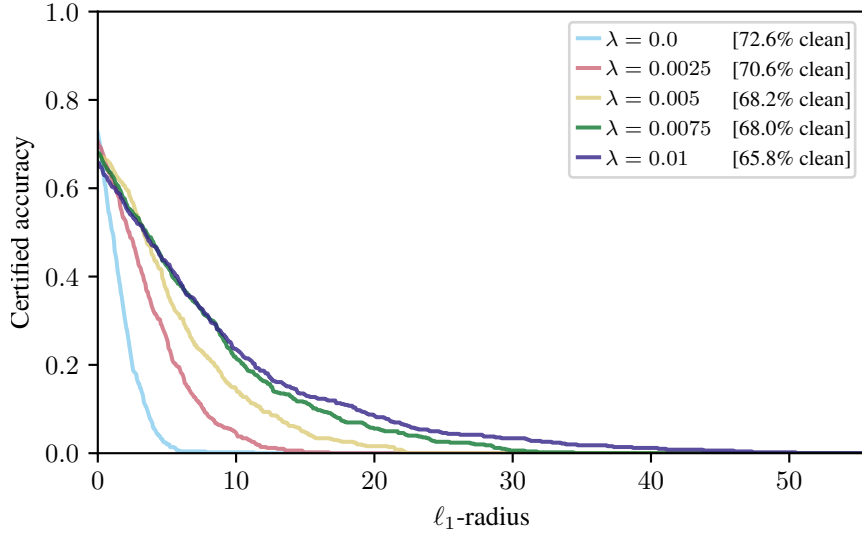

Figure 11: Impact of the Jacobian regularization parameter  $\lambda$  on CIFAR-10 cats-dogs classification.

As expected, the clean accuracies for both datasets are lower for  $\varphi = \text{Id}$ , while the certified radii are generally larger due to the Lipschitz scaling factor in Theorem 3.1. Interestingly, while the standard  $\varphi$  produces comparable performance in both experiments, the identity feature map classifier is more effective in the dogs-cats experiment, achieving around 7% greater clean accuracy. This reflects the observation that convex separability is an asymmetric condition and suggests that feature maps can mitigate this concern.

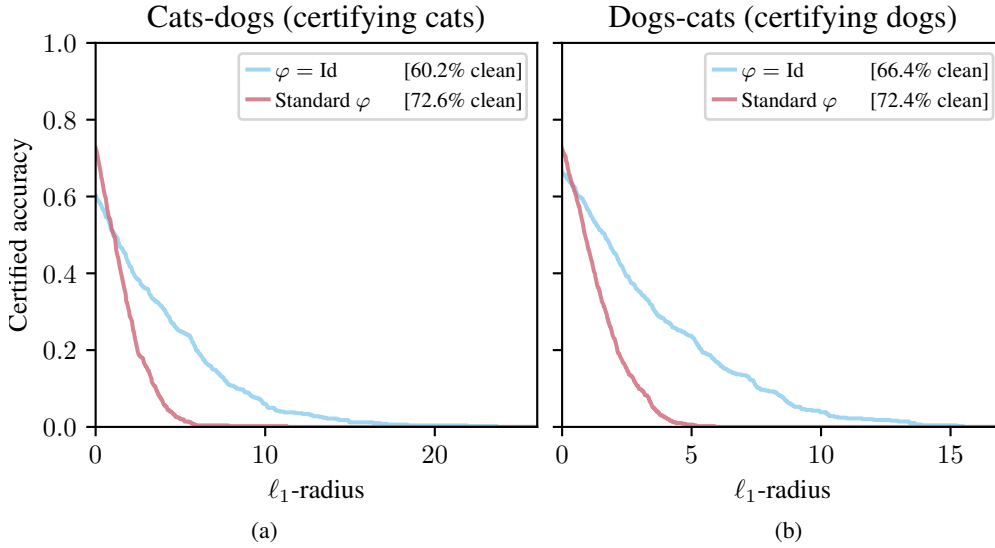

Figure 12: (a) Certification performance with cats as class 1 and dogs as class 2. (b) Certification performance with dogs as class 1 and cats as class 2.

### G.3 Unaugmented Accuracies

Table 3 summarizes the experimental counterpart to Section 3.2. Namely, Corollary 3.8 proves that there exists an input-convex classifier ( $\varphi = \text{Id}$ ) that achieves perfect training accuracy on the CIFAR-10 cats-dogs dataset with no dataset augmentations (random crops, flips, etc.). Our practical

experiments are far from achieving this theoretical guarantee, with just 73.4% accuracy for cats-dogs and 77.2% for dogs-cats. Improving the practical performance of input-convex classifiers to match their theoretical capacity is an exciting area of future research.

Table 3: CIFAR-10 accuracies with no feature augmentation ( $\varphi = \text{Id}$ ) and no input augmentation.

| Class 1-class 2 data | Training accuracy | Test accuracy (balanced) |
|----------------------|-------------------|--------------------------|
| Cats-dogs            | 73.4%             | 57.3%                    |
| Dogs-cats            | 77.2%             | 63.9%                    |

## H MNIST Classes Sweep

For our comparison experiments, we select a specific challenging MNIST class pair (3 versus 8). For completeness, this section includes certification results for our method over all combinations of class pairs in MNIST. As this involves training models over 90 combinations, we lower the number of epochs from 60 to 10, maintaining all other architectural details described in Appendix E.

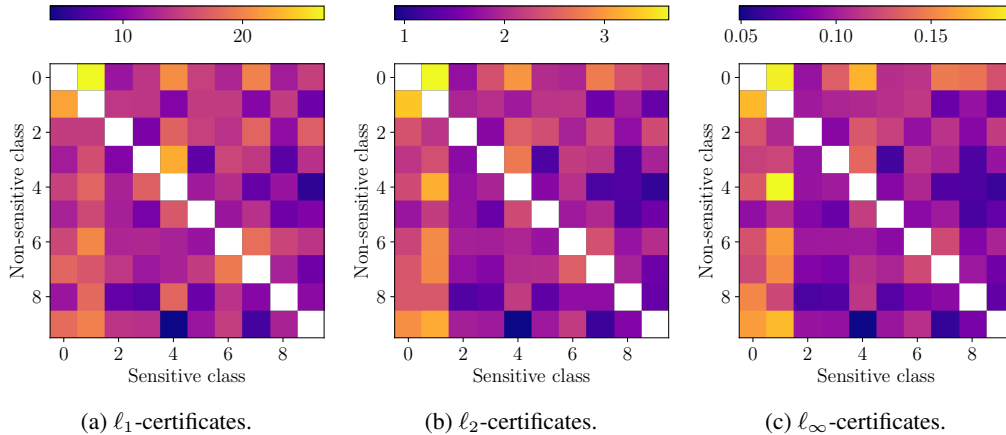

Figure 13: Plotting the median certified radii for the MNIST feature-convex architecture over a range of class combinations. The horizontal axis is the class being certified. The MNIST 3-8 experiment considered throughout therefore corresponds to the cell (3, 8) in each plot.

Our certified radii naturally scale with the complexity of the classification problem. As expected, 3 and 8 are among the most challenging digits to distinguish, along with 2-8, 5-8, 4-9, and 7-9. Particularly easy combinations to classify typically include 0 or 1.

The certification performance is remarkably symmetric across the diagonal despite the asymmetry in our convex architectures. In other words, when classifying between digits  $i$  and  $j$ , if a convex classifier exists which generates strong certificates for  $i$ , then we can generally train an asymmetric classifier that generates strong certificates for  $j$ . A few exceptions to this can be seen in Figure 13; the most notable are the 1-9 versus 9-1 pairs and the 4-8 versus 8-4 pairs. A deeper understanding of how class characteristics affect asymmetric certification is an exciting avenue of future research.

## I Randomized Smoothing Noise Level Sweeps

In this section, we reproduce the performance randomized smoothing classifiers under different noise distributions for a range of noise parameters  $\sigma$ . Namely, we sweep over multiples of base values of  $\sigma$  reported in the subcaptions of Figures 14, 15, and 16. The base values of  $\sigma$  were set to  $\sigma = 0.75$  for the MNIST 3-8, Fashion-MNIST, and CIFAR-10 cats-dogs experiments. For the higher-resolution Maling experiment, we increase the base noise to  $\sigma = 3.5$ , matching the highest noise level examined in Levine and Feizi [40]. The epochs used for training were similarly scaled by  $n$ , starting from the base values provided in Section E, with the exception of the CIFAR-10 base epochs being increased to 600 epochs.



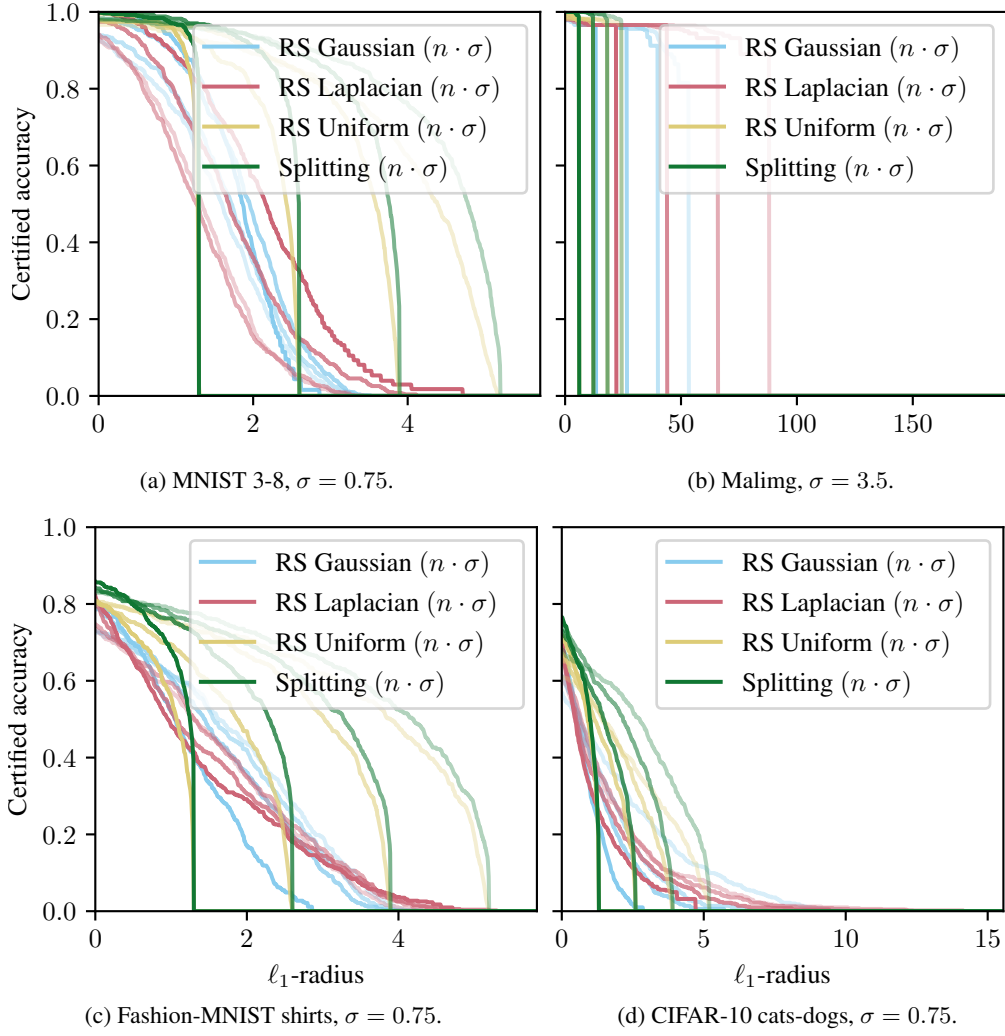

Figure 14: Randomized smoothing certified radii sweeps for the  $\ell_1$ -norm. Line shade indicates value of the integer noise multiplier  $n$ , with  $n$  ranging from 1 (darkest line) to 4 (lightest line).

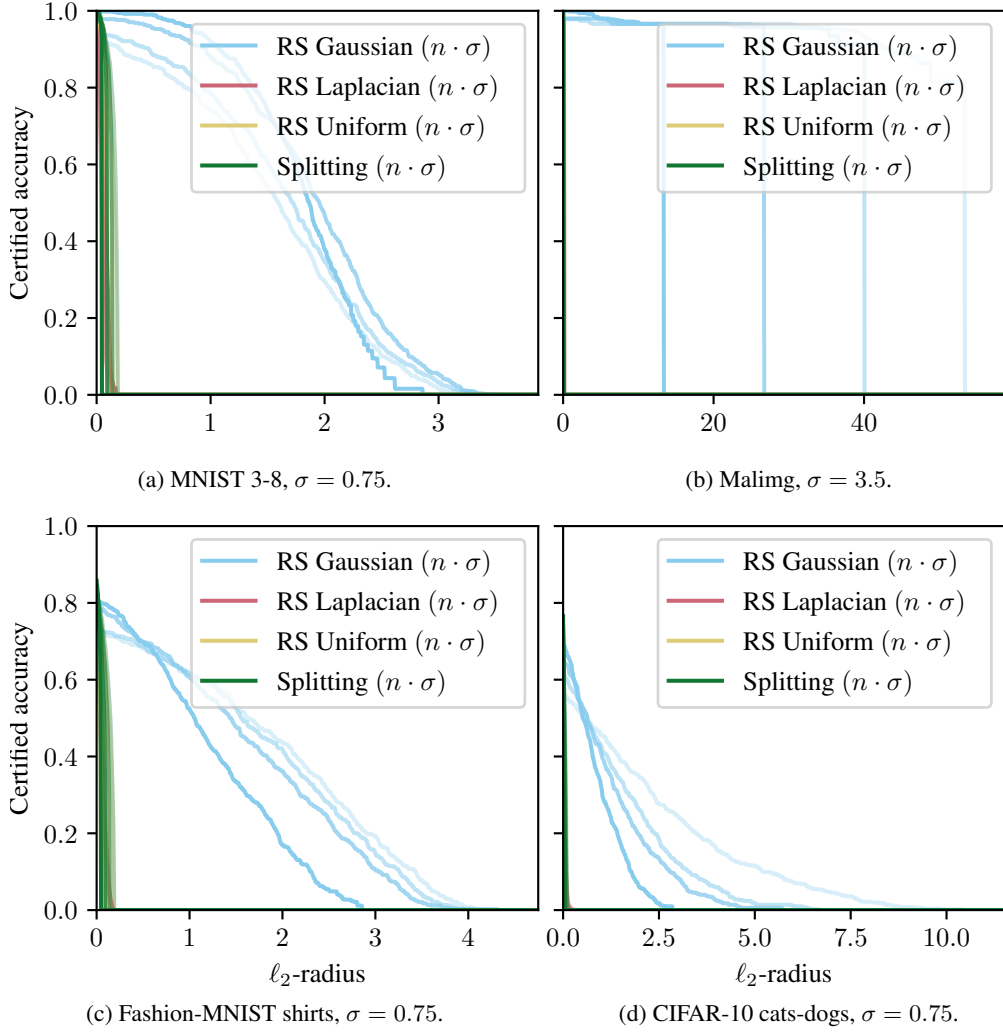

Figure 15: Randomized smoothing certified radii sweeps for the  $\ell_2$ -norm. Line shade indicates value of the integer noise multiplier  $n$ , with  $n$  ranging from 1 (darkest line) to 4 (lightest line). For higher-dimensional inputs (Maling and CIFAR-10) methods which certify to a different norm and convert are uncompetitive.

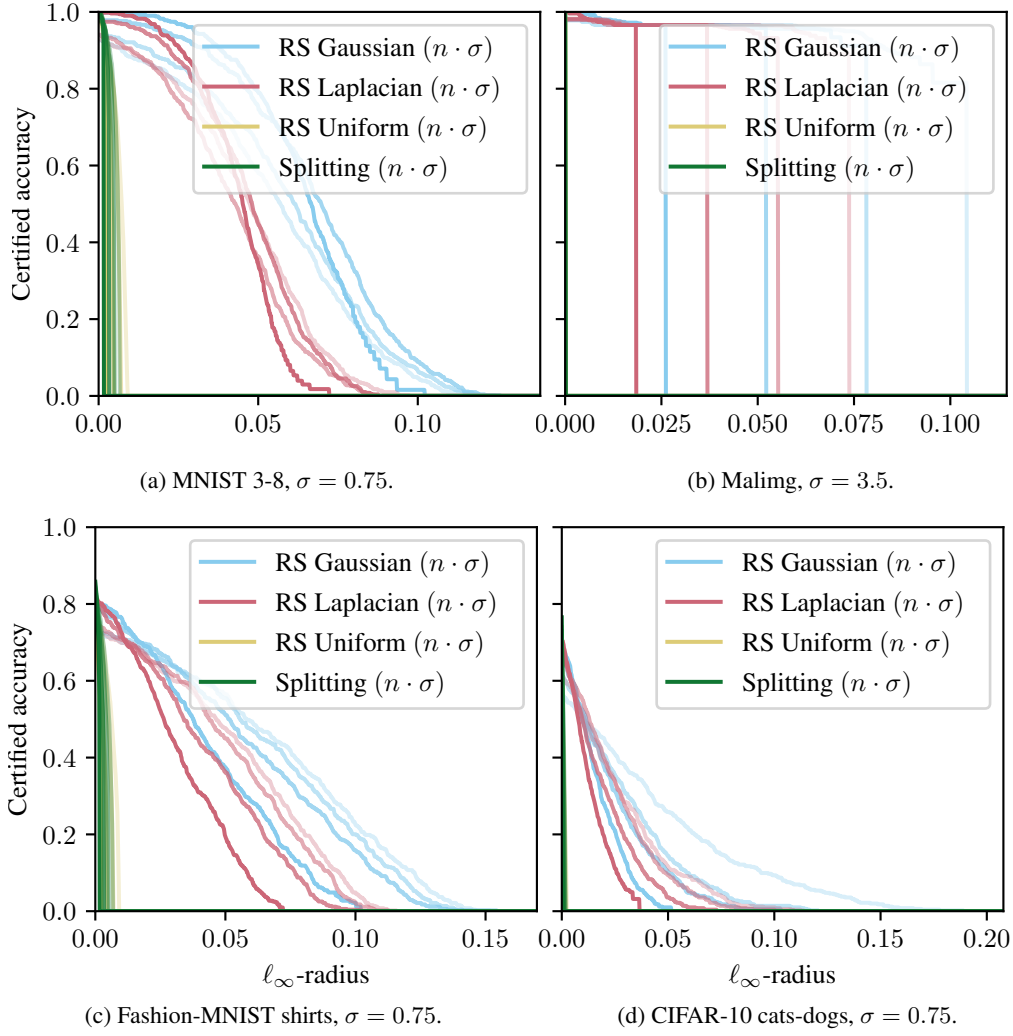

Figure 16: Randomized smoothing certified radii sweeps for the  $\ell_\infty$ -norm. Line shade indicates value of the integer noise multiplier  $n$ , with  $n$  ranging from 1 (darkest line) to 4 (lightest line).
